# Supplementary material for: Timing and causes of North African wet phases during the last glacial period and implications for modern human migration
Source: PubMed Central journal article supplement (PMC5093410; doi:10.1038/srep36367), 2016-11-03
Supplement: srep36367-s1.pdf [file srep36367-s1.pdf]

## Supplementary information

# Timing and causes of North African wet phases during the last glacial period and implications for Modern Human migration

Dirk L. Hoffmann, Mike Rogerson, Christoph Spötl, Marc Luetscher, Derek Vance, Anne H. Osborne, Nuri M. Fello, Gina E. Moseley

### Location Susah Cave

Susah Cave ( $32^{\circ}53.419' \text{ N}$ ,  $21^{\circ}52.485' \text{ E}$ ) is a shallow cave positioned at  $\sim 200 \text{ m}$  altitude on the northern flank of Jebel Malh in the Jebel Al Akhdar in Cyrenaica (Fig. S1). The cave formed in the Dernah Formation, which consists of hard and massive Eocene limestones, with some dolomitised layers<sup>1</sup>. The cave consists of three large ( $\sim 10 \text{ m}$  radius), roughly circular chambers separated by  $\sim 1 \text{ m}$  high fossil phreatic tubes. Today, Susah Cave is completely fossil with no evidence of contemporary water flow anywhere in the cave. Formations are covered by dust, and the majority are broken. The region experiences  $\sim 180 \text{ mm}$  precipitation per year, with most rainfall generally occurring between October and April. A map with recent precipitation patterns of the wider area can, for example, be found in Engelstaedter et al. (2006)<sup>2</sup>. There is only thin soil cover and the vegetation consists of Mediterranean “Maquis”.

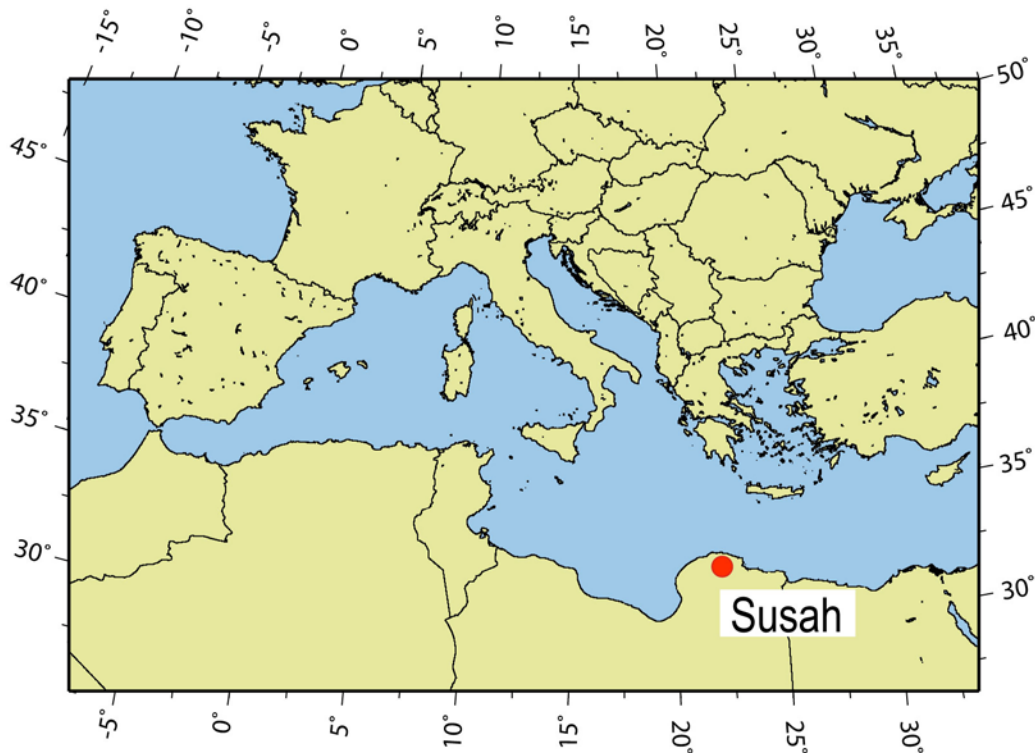

**Fig. S1:** Map with location of Susah Cave, Cyrenaica (Libya). The map was created using the Geomar GMT-Maps web site (<http://sfb574.geomar.de/gmt-maps.html>).

### Stalagmite SC-06-01

The sample used for this study is a 93 cm-long stalagmite (SC-06-10), which was found broken on site. The three broken pieces fit together and the bottom also fits onto a stump found in the cave. Thus it represents the complete specimen with no missing parts. The diameter varies along the growth axis between 11 and 16 cm. The stalagmite consists of sections of dense clear calcite and milky white calcite. There are several thin red layers similar in colour to the surface dust layer, indicating dust deposition during frequent drying of the stalagmite surface. The main growth axis also shows some slight changes in growth direction. Over the top 30 cm a twin stalagmite formed.

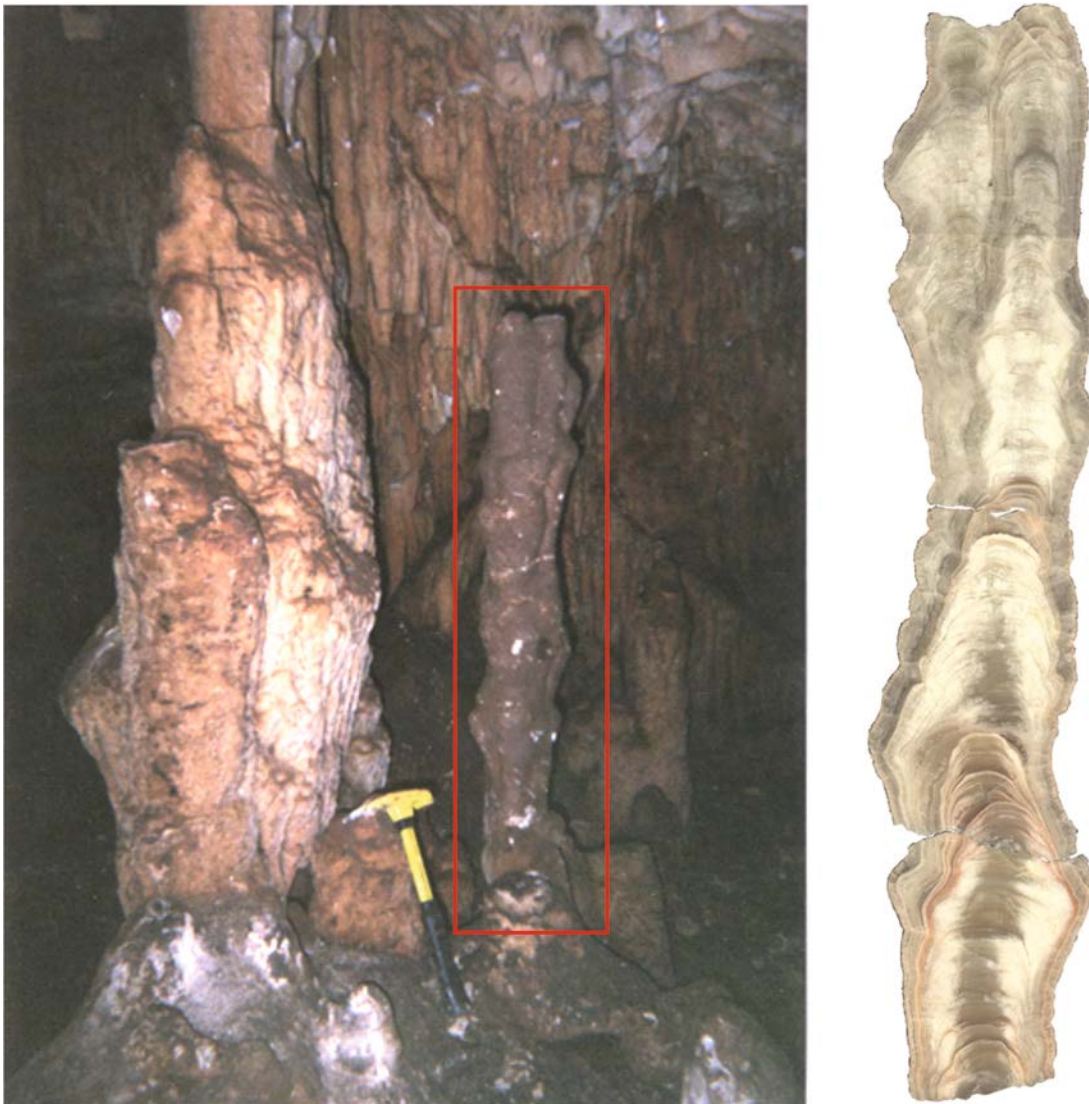

**Fig. S2:** SC-06-01 (in red box) pieces put together on the stump inside the cave (left) and polished cross section along the growth axis (right).

We defined three main growth sections and twelve minor growth sections based on the crystal structure and visual layering, positions of red layers in the stalagmite and chronological results (see below). Half of the red layers are associated with a hiatus identified by U-series

chronology data and mark the start / end of a growth phase. The other red layers are probably also associated with (short) hiatuses, which cannot be constrained within uncertainty of U-series results. The main sections are all longer than 16 cm, and cover 75 % of the total length of growth without detectable hiatuses. Section I is between 5.6 and 23.7 cm from the bottom, section II from 34.2 to 50.2 cm and section III from 55.4 to 92.1 cm (plus 19 cm of the parallel growth axis). The minor sections are short episodes of stalagmite formation and display frequent red layers indicating dry phases in Susah Cave. Minor sections are a maximum of 4 cm long and together cover 25 % of the stalagmite formation.

Figures S3 a-c show the three polished pieces of SC-06-01. The grey bars indicate the main axis, dark grey represents main sections I, II and III, light grey represents minor sections 1 to 12. The red lines indicate the positions of red coloured layers. Dotted layers are not associated with a longer hiatus exceeding uncertainties in the dating results.

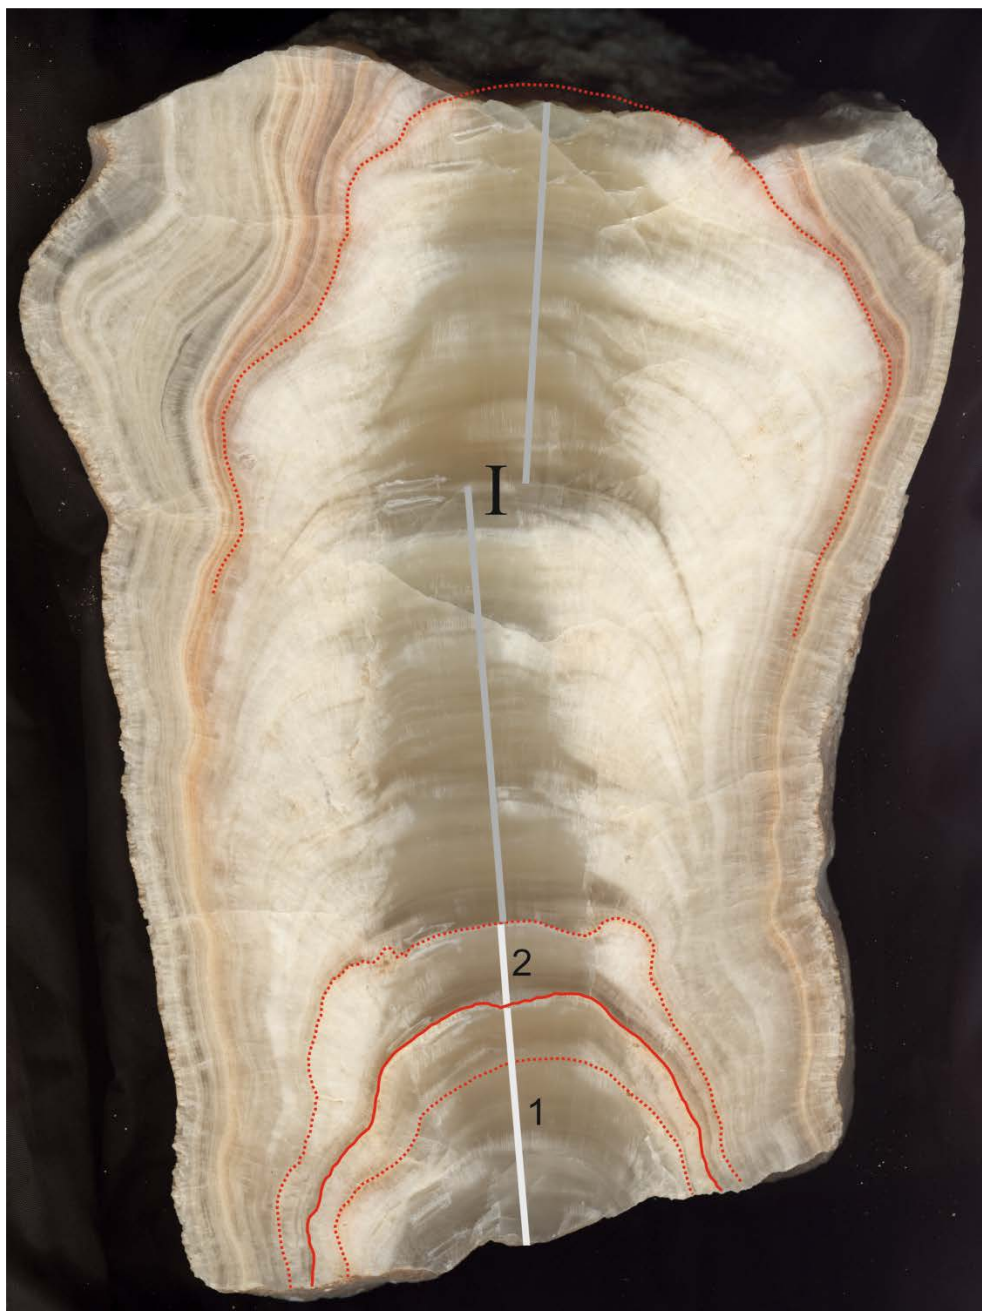

**Fig. S3 a:** SC-06-01 1, bottom piece.



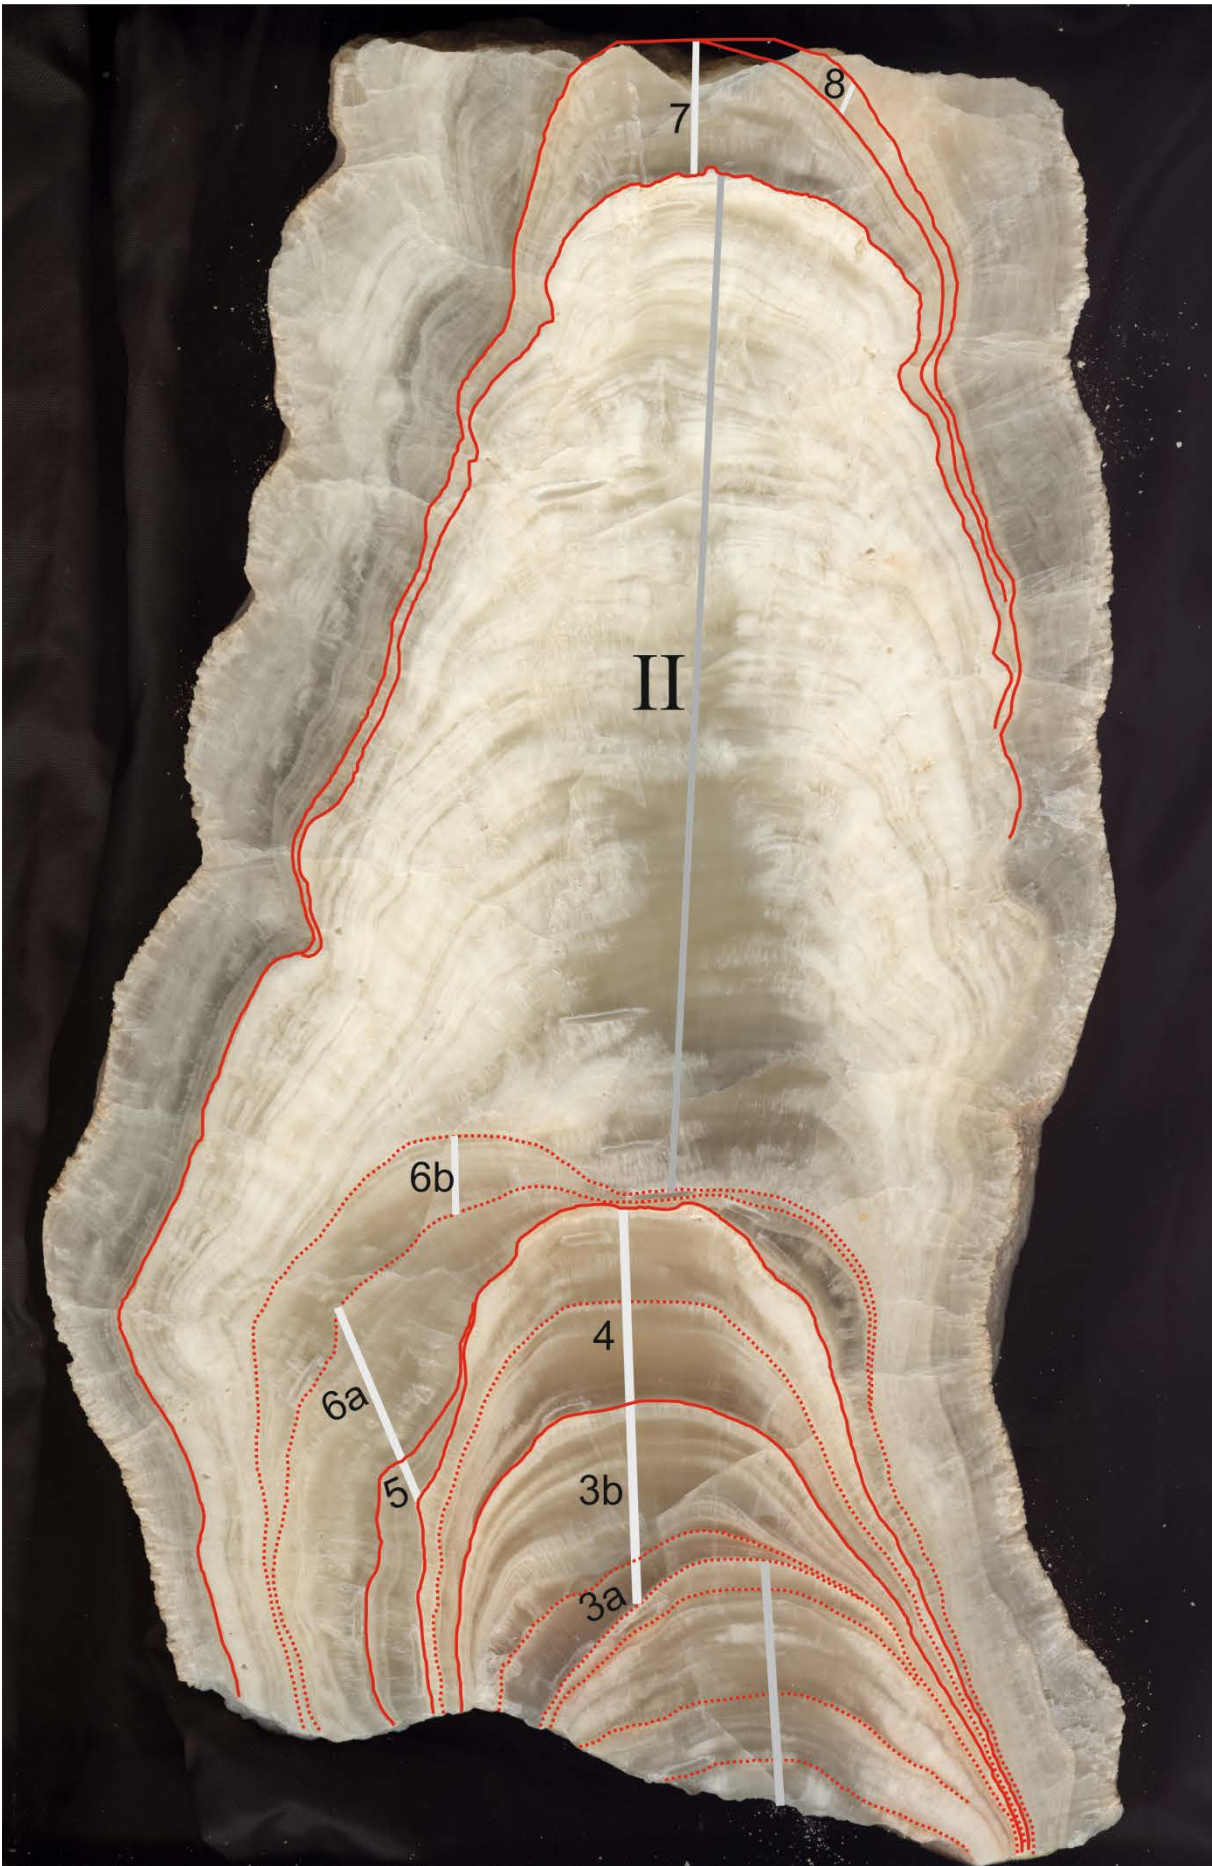

Fig. S3 b: SC-06-01 2, middle piece.

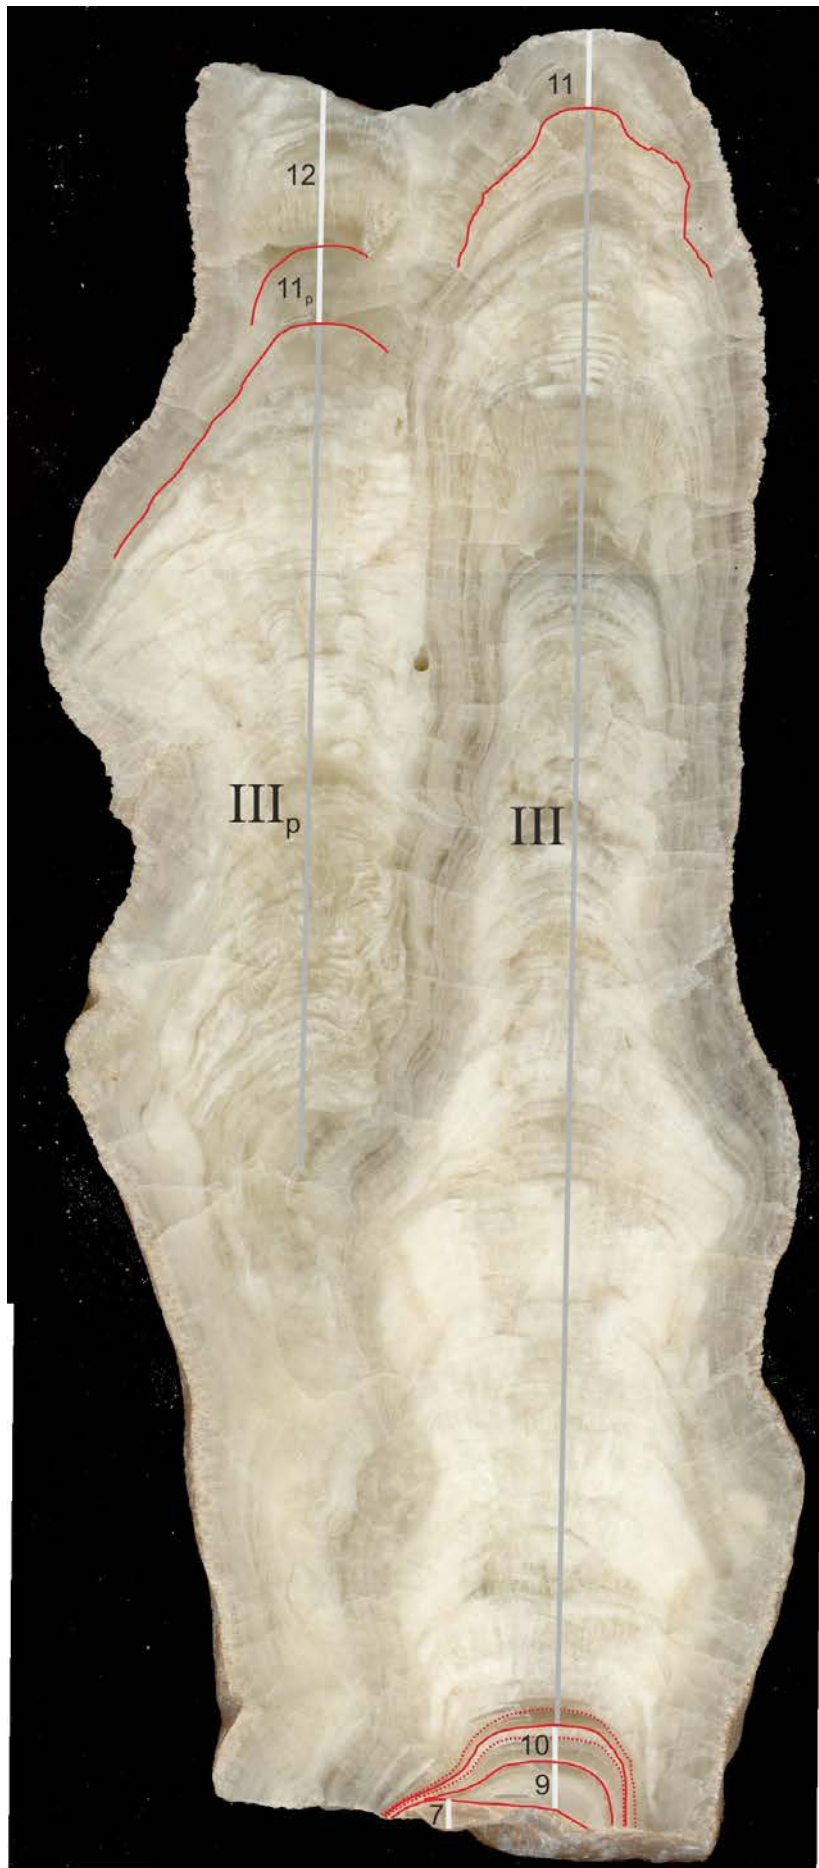

**Fig. S3 c:** SC-06-01 3, top piece.

## U-series dating and age model

Stalagmite SC-06-01 consists of three broken pieces, which were cut along the growth axis and polished. Some sections were further cut into slabs along the growth axis for subsampling by micromill or with a wire saw. Sub samples for U-Th dating were either drilled using a hand held microdrill (powders) or small pieces were cut from slabs using a diamond wire saw (pieces). Sample masses for U-Th analyses varied between 10 and 180 mg.

Separation and purification of U and Th isotopes from the matrix was done using modified methods similar to Hoffmann <sup>3</sup>. Anion exchange chemistry consists of a double resin procedure with AG 1x8 used to separate U and Th followed by a first Th fraction purification using AG 1x8. Final purification of U and Th fractions is done using UTEVA resin. U and Th isotope compositions are measured by MC-ICPMS following procedures outlined in Hoffmann, et al. (2007) <sup>4</sup>. The following decay constants are used to calculate activity ratios:  $\lambda_{238} = (1.55125 \pm 0.0017) \cdot 10^{-10} \text{ a}^{-1}$  <sup>5</sup>,  $\lambda_{234} = (2.826 \pm 0.0056) \cdot 10^{-6} \text{ a}^{-1}$  <sup>6</sup>,  $\lambda_{232} = (4.95 \pm 0.035) \cdot 10^{-11} \text{ a}^{-1}$  <sup>7</sup>,  $\lambda_{230} = (9.1577 \pm 0.028) \cdot 10^{-6} \text{ a}^{-1}$  <sup>6</sup>.

The concentration of <sup>238</sup>U varies between 134 and 756 ng/g, with an average of 388 ng/g. U concentrations are found to be slightly higher in the bottom 300 mm and lower in the top part of the stalagmite. Initial <sup>234</sup>U/<sup>238</sup>U activity ratios are quite consistent around 1.28. The calcite is clean and almost free of detrital components. All <sup>230</sup>Th/<sup>232</sup>Th activity ratios are greater than 240 and the mean ratio is 6200, thus, a correction for detrital Th has no significant effect on the measured activity ratios and calculated ages (Table S1). However, a correction is usually applied where <sup>232</sup>Th is measurable, and a bulk earth value of the upper crust (<sup>238</sup>U/<sup>232</sup>Th<sub>act</sub> = 0.8 ± 0.4) <sup>8</sup> is used for detrital correction.

The stalagmite started forming around 66.5 ka and grew episodically until about 30.8 ka. The detailed chronology for SC-06-01 is based on 116 dating results along the growth axis (104 on the main axis and 12 on the twin axis at the top) and typical age uncertainties are in the range of 0.7 %. All uncertainties are at the 95 % confidence interval. Table S1 shows all analytical results and calculated ages. Fig. S4 shows all dating results versus distance on the growth axis, and Figures S5 a-c show details of the sections. The positions of red layers in the stalagmite are indicated by red lines. Dotted red lines represent red layers where no significant hiatus is obvious in the dating results.

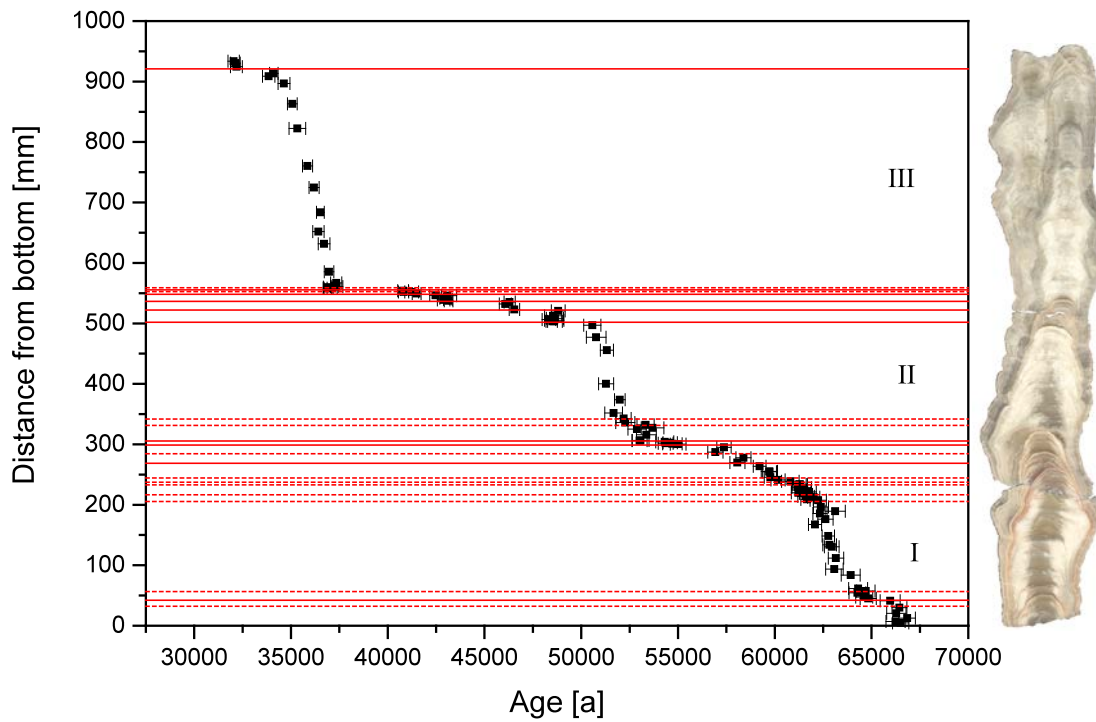

**Fig. S4:** Same as Fig. 2 in the main article. U-series dating results of SC-06-01, on the right cross section of stalagmite SC-06-01 scaled to the distances from bottom of the dating results. Dating results for the parallel section at the top of the stalagmite are not shown, see Fig. S6.

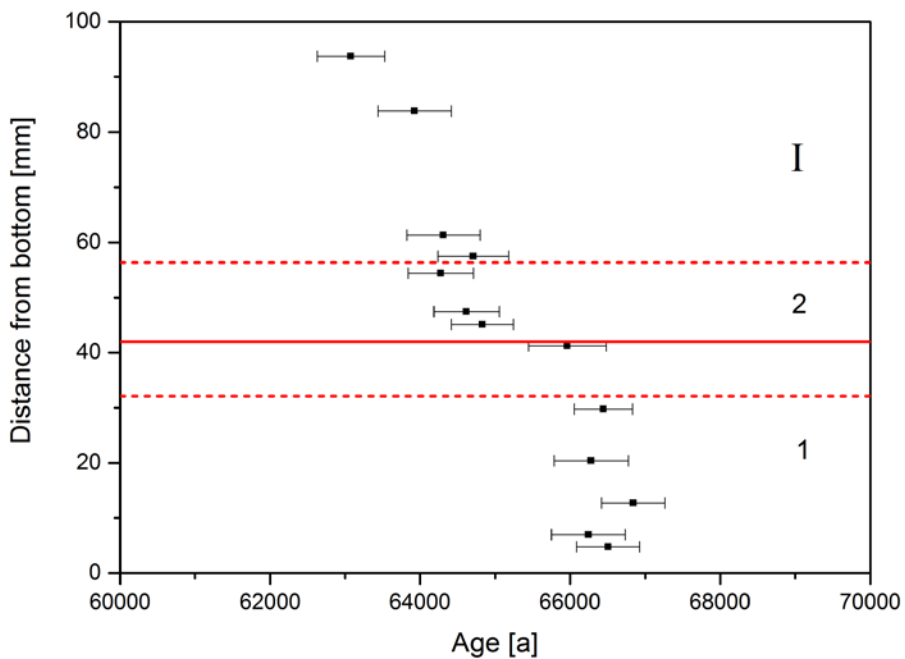

**Fig. S5 a:** Detail of Fig. S4, showing the dating results of sections with red layers.



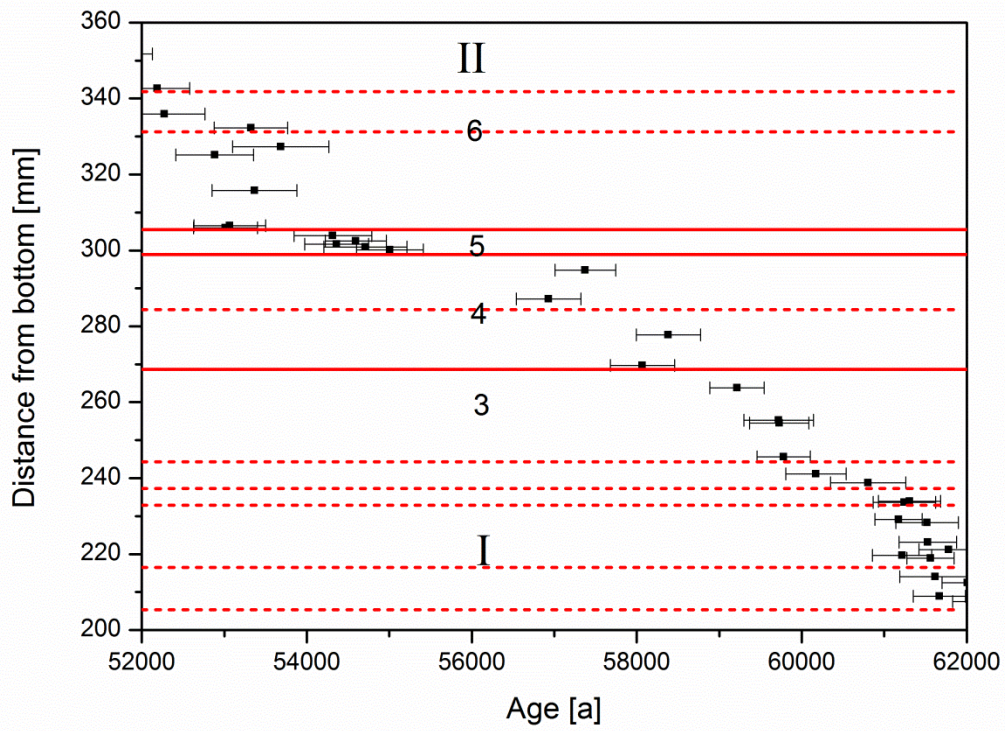

Fig. S5 b: Detail of Fig. S4, showing the dating results of sections with red layers.

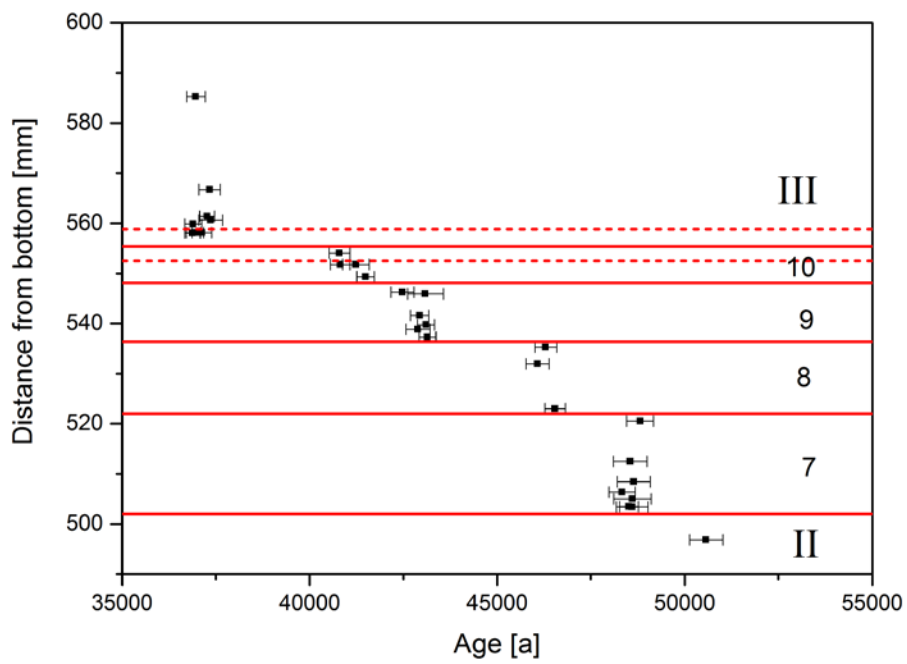

Fig. S5 c: Detail of Fig. S4, showing the dating results of sections with red layers.



Dating results of the parallel growth section at top of stalagmite are presented in Fig. S6. Here distances are shown from the top of the section. One dating result obtained on a sample taken from a boundary area between two sections including a red layer (between III<sub>p</sub> and 11<sub>p</sub>) is not in stratigraphic order.

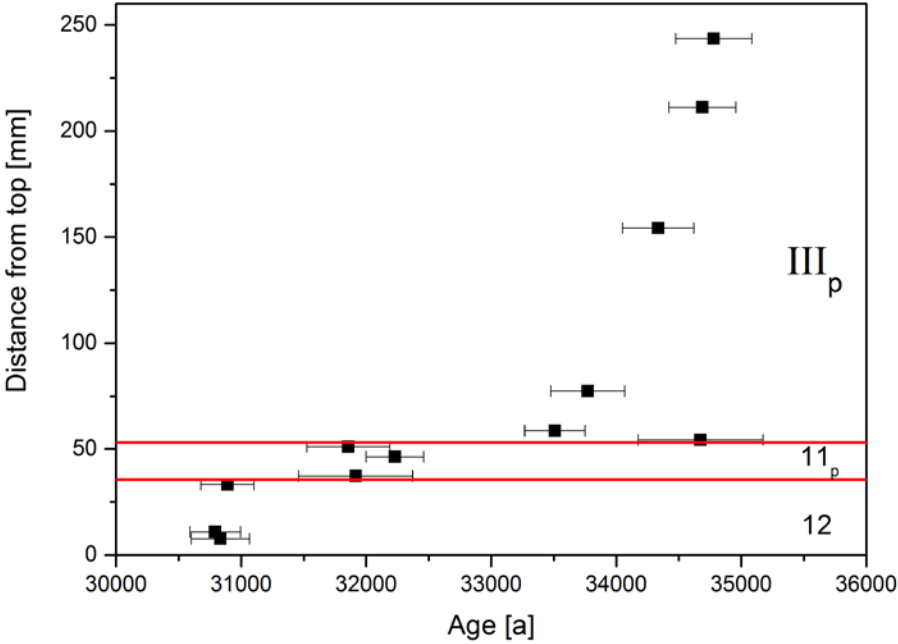

**Fig. S6:** U-Th dating results of the parallel growth axis at the top of SC-06-01.

## Distance - age model

A distance-age model was generated for SC-06-01 using StalAge<sup>9</sup>. Distance age modeling was done sectionwise. The start and end of the sections / growth episodes are defined by the red layers associated with a detectable hiatus in the dating results. The distance-age model is shown in Fig. S7 a (main growth axis) and Fig. S7b (parallel growth axis at the top). The red lines indicate upper and lower 95% confidence levels of the age model.

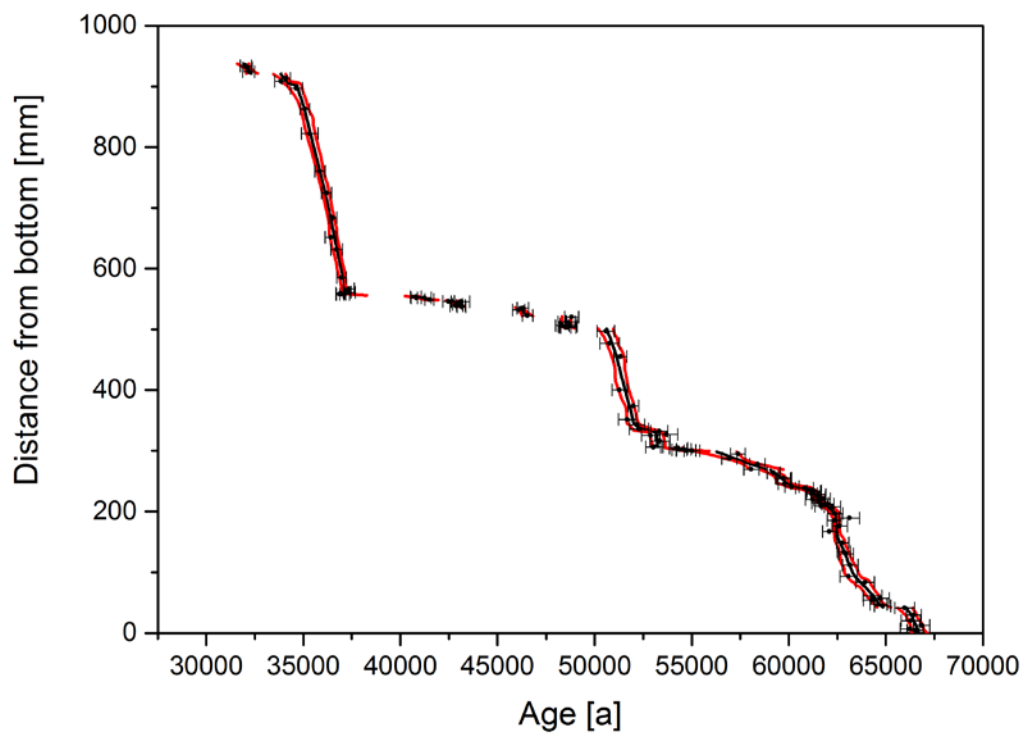

**Fig. S7 a:** Distance-age model for SC-06-01, main growth axis, derived using StalAge<sup>9</sup>.

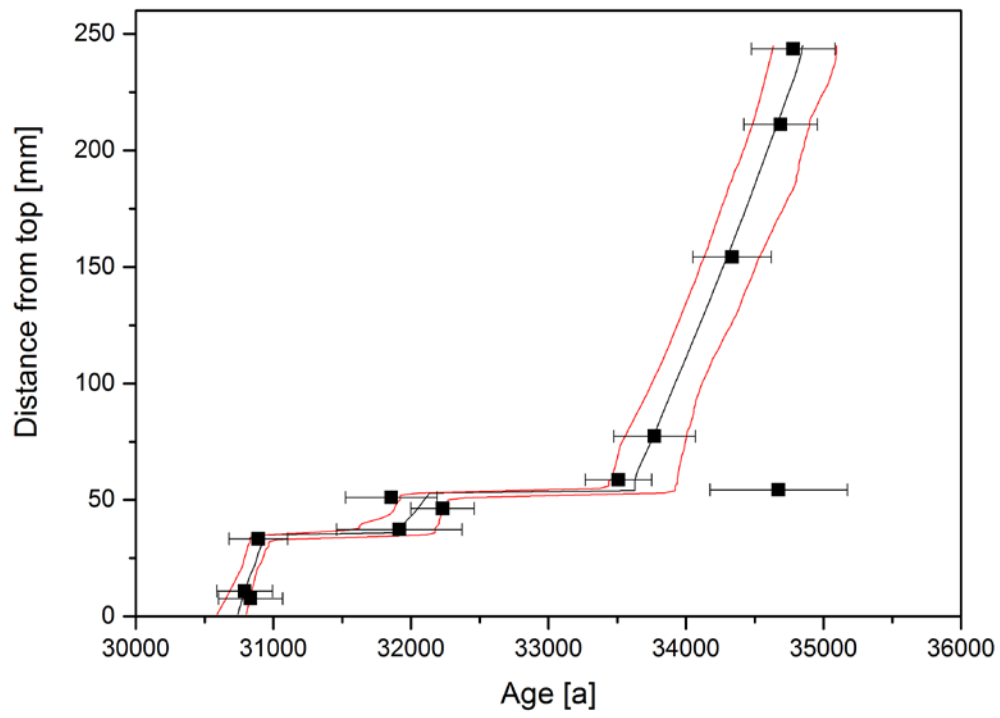

**Fig. S7 b:** Distance-age model for SC-06-01, parallel growth axis, derived using StalAge<sup>9</sup>.



## Stable isotopes results

Fig. S8 shows  $\delta^{18}\text{O}$  and  $\delta^{13}\text{C}$  results for the main axis of SC-06-01. Figures 8 and 9 a-d compare the Susah Cave oxygen isotope record ( $\delta^{18}\text{O}_{\text{SC}}$ ) to the Greenland ice core oxygen isotope  $\delta^{18}\text{O}_{\text{NGRIP}}$ <sup>10</sup>. The chronology for NGRIP older than 60 ka is based on GICC05modelext<sup>11</sup>.

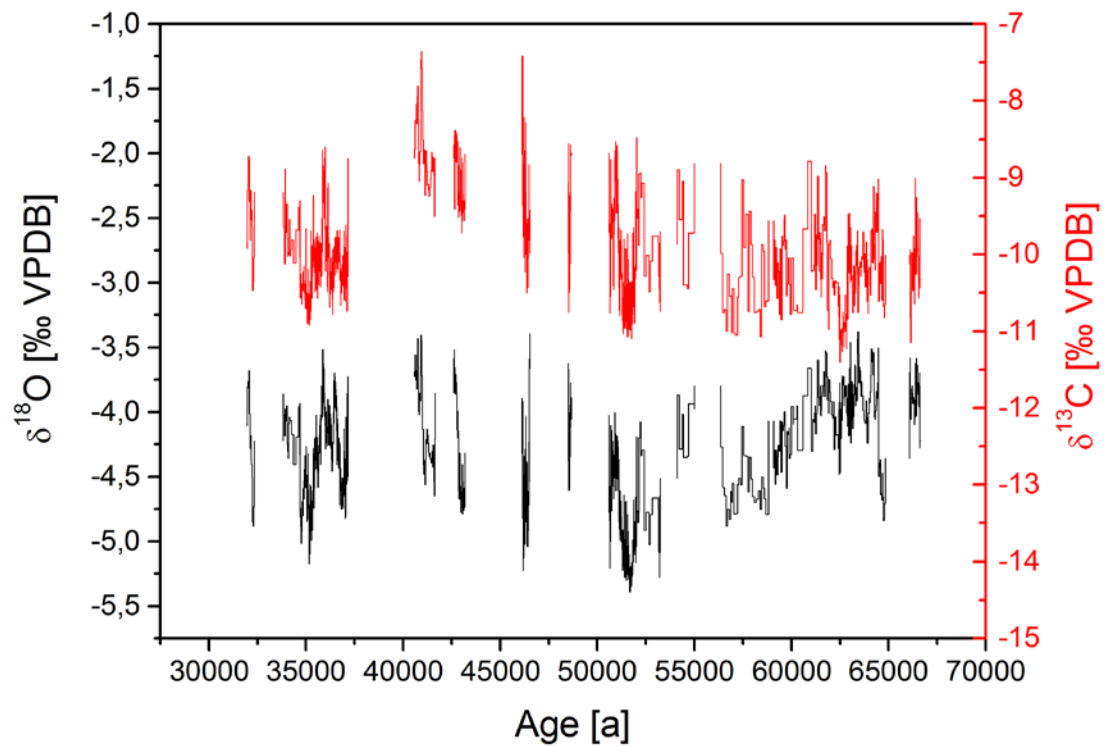

**Fig. S8:** Stable oxygen ( $\delta^{18}\text{O}$ ) and carbon ( $\delta^{13}\text{C}$ ) isotope results of stalagmite SC-06-01.

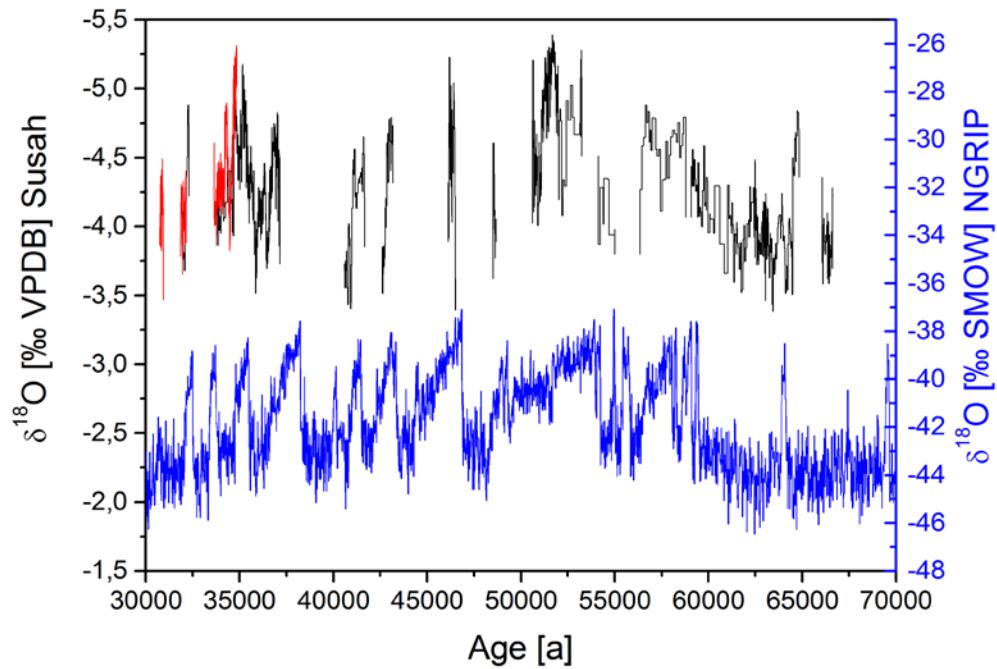

**Fig. S9:** Stable oxygen ( $\delta^{18}\text{O}$ ) results of stalagmite SC-06-01 and Greenland ice core (NGRIP) <sup>10,11</sup> between 70 and 30 ka. The red line shows results on the parallel top section of SC-06-01.

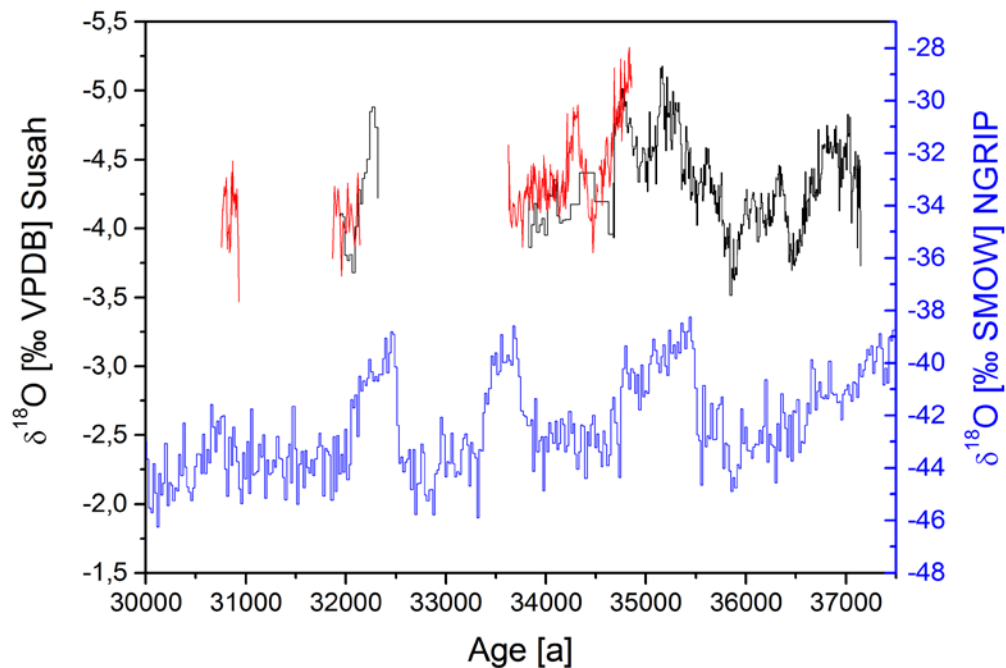

**Fig. S10 a:** Detail of Fig. S9, stable oxygen ( $\delta^{18}\text{O}$ ) results of stalagmite SC-06-01 and Greenland ice core (NGRIP) <sup>10,11</sup> between 37.5 and 30 ka.

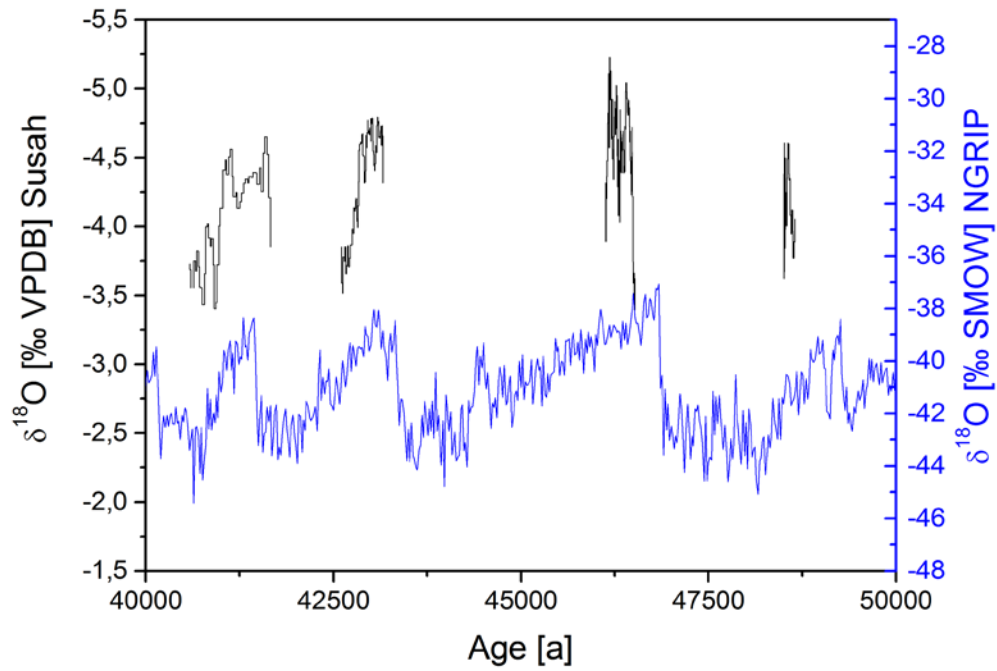

**Fig. S10 b:** Detail of Fig. S9, stable oxygen ( $\delta^{18}\text{O}$ ) results of stalagmite SC-06-01 and Greenland ice core (NGRIP) <sup>10,11</sup> between 50 and 40 ka.

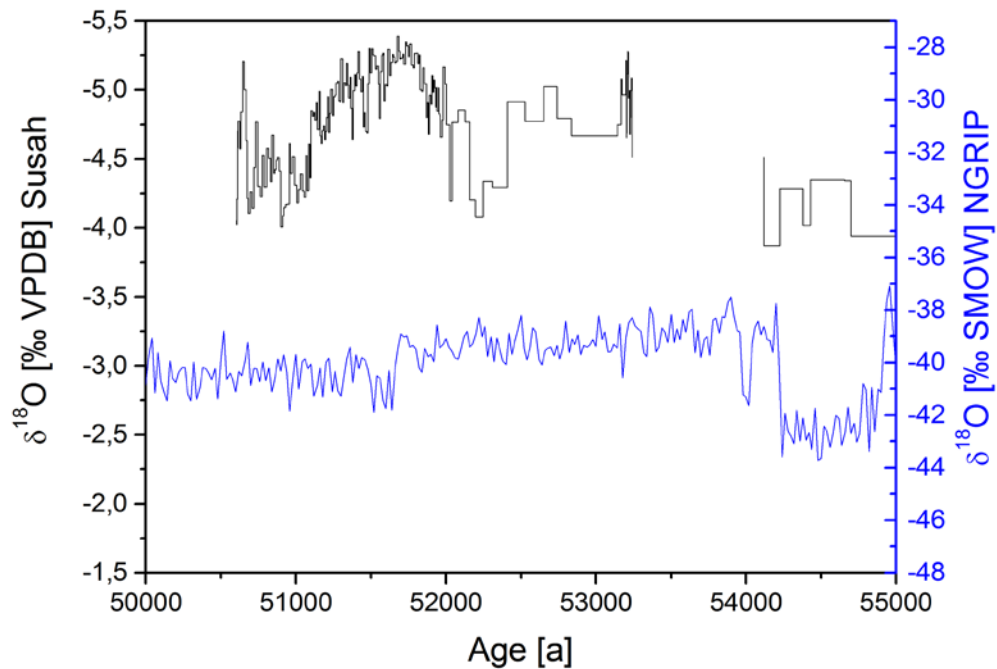

**Fig. S10 c:** Detail of Fig. S9, stable oxygen ( $\delta^{18}\text{O}$ ) results of stalagmite SC-06-01 and Greenland ice core (NGRIP) <sup>10,11</sup> between 55 and 50 ka.



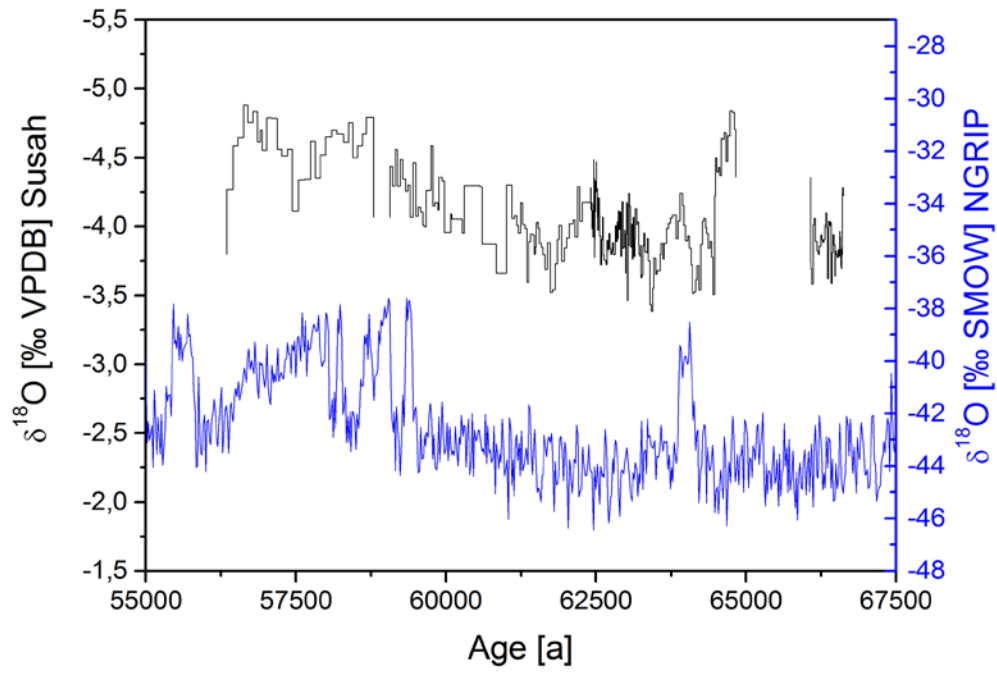

**Fig. S10 d:** Detail of Fig. S9, stable oxygen ( $\delta^{18}\text{O}$ ) results of stalagmite SC-06-01 and Greenland ice core (NGRIP) <sup>10,11</sup> between 67.5 and 55 ka.

## Comparison of timing of wet phases to Northern Hemisphere insolation changes

Growth phases of SC-06-01 are compared to insolation at 30°N in June and December as well as to the insolation gradient between 60°N and 30°N (the difference is calculated as insolation at 60°N minus insolation at 30°N). Insolation values are taken from Berger and Loutre (1991)<sup>12</sup>. Fig. S11 a shows summer insolation (June) at 30°N and Fig. S12 a winter insolation (December) at 30°N, both between 70 and 30 ka. SC-06-01 growth phases are indicated by the  $\delta^{18}\text{O}$  record, additionally, the grey bars highlight the three main growth phases. Figures S11 b and S12 b show the 60°N-30°N insolation gradient between 70 and 30 ka.

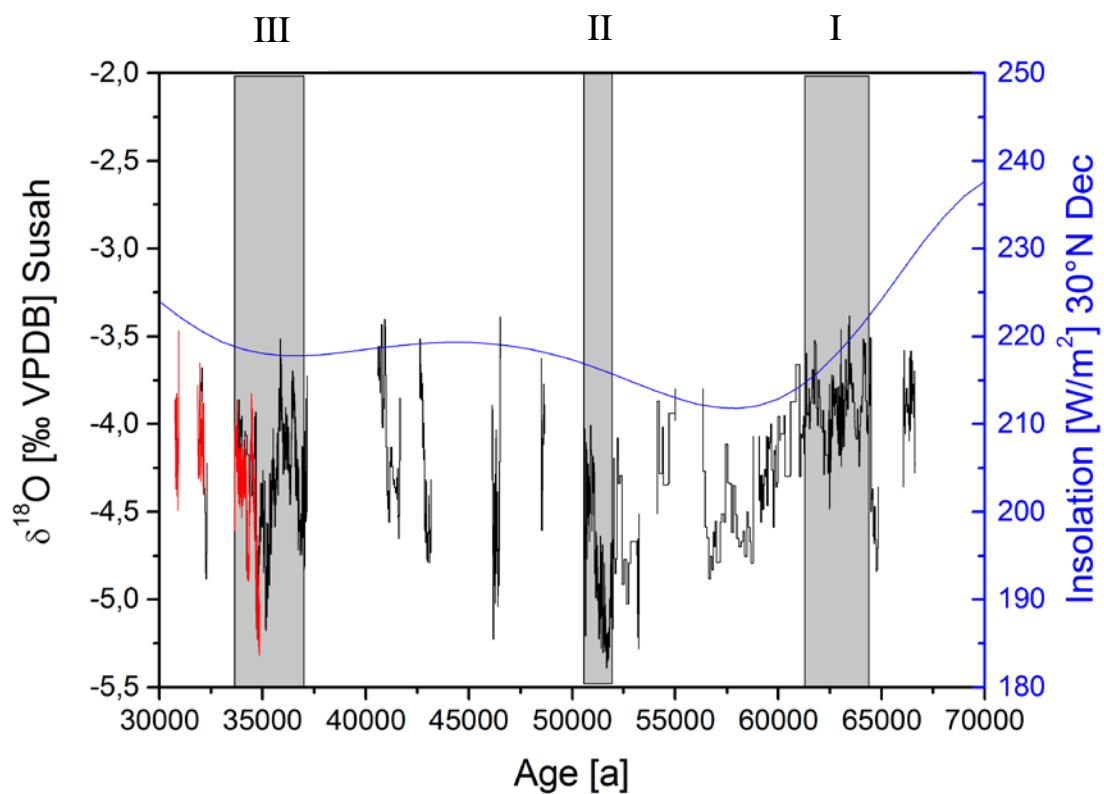

**Fig. S11 a:** SC-06-01  $\delta^{18}\text{O}$  record and Northern Hemisphere winter insolation at 30°N<sup>12</sup>. Grey bars indicate the three main growth phases (I, II and III) of SC-06-01.

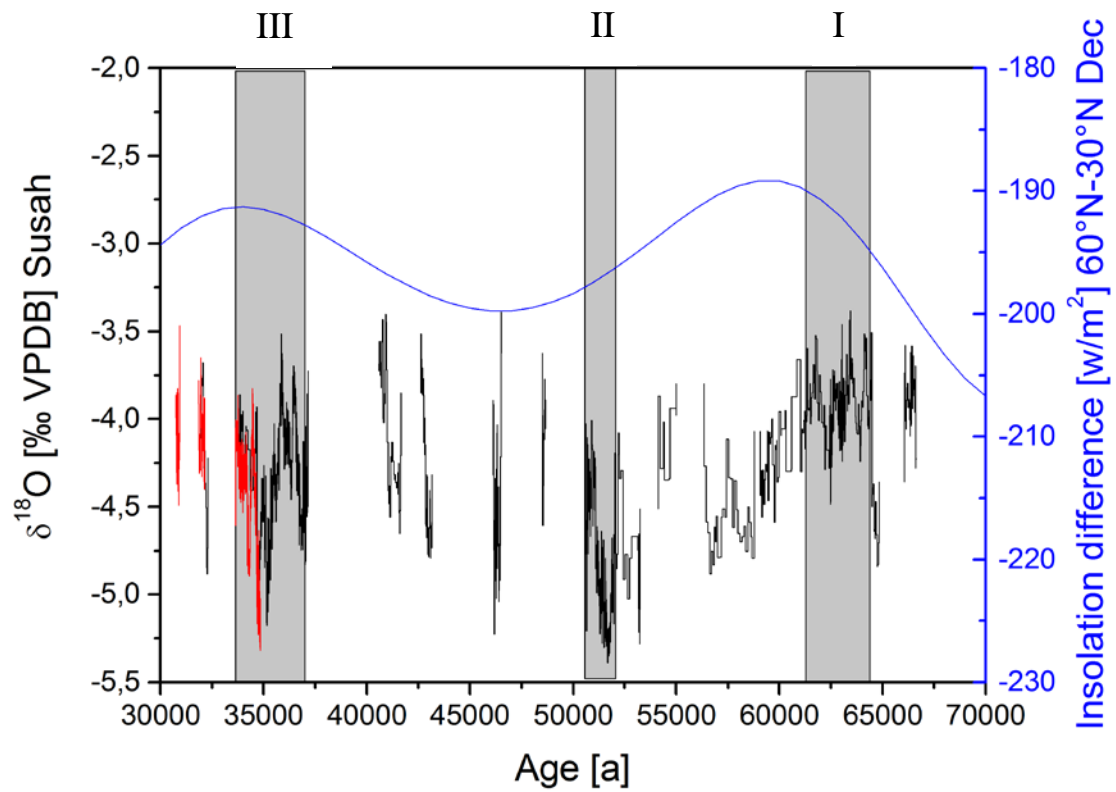

**Fig. S11 b:** SC-06-01  $\delta^{18}\text{O}$  record and difference of winter insolation between 30°N and 60°N (calculated as insolation at 60°N minus insolation at 30°N)<sup>12</sup>. Grey bars indicate the three main growth phases (I, II and III) of SC-06-01. Precession minimum results in two peaks of maximum December insolation gradient at 60°N relative to 30°N around 60 ka and 34 ka.



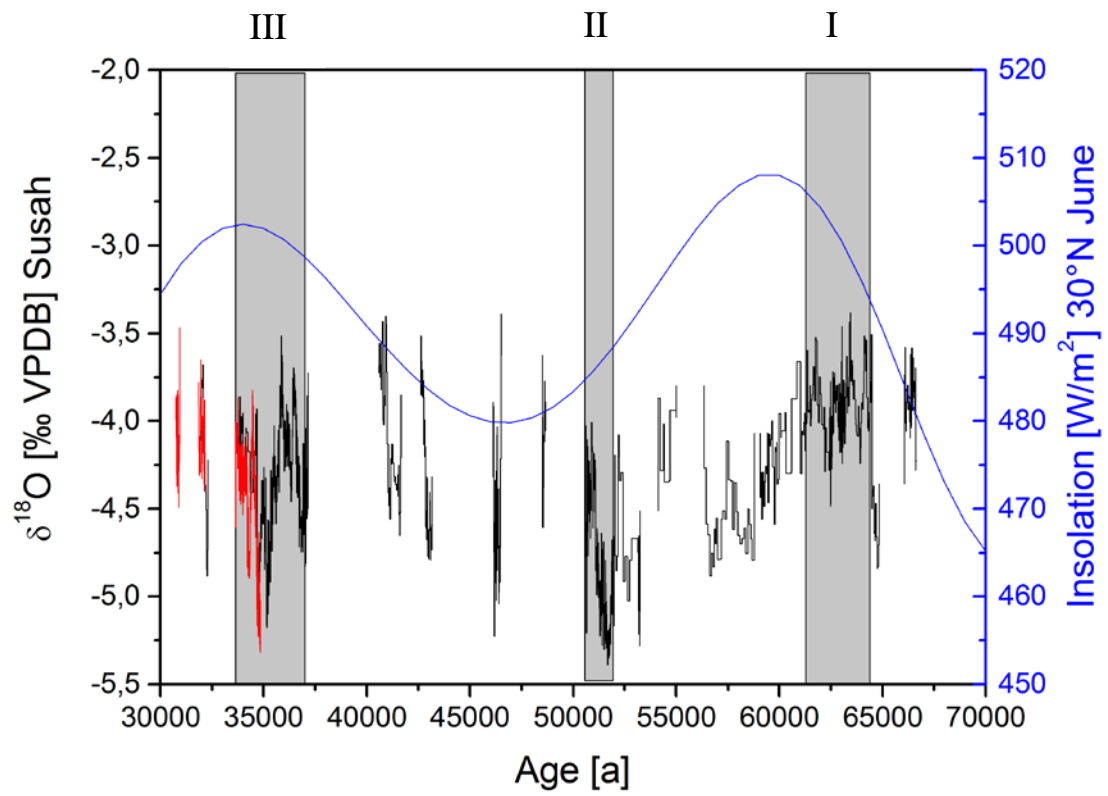

**Fig. S12 a:** SC-06-01  $\delta^{18}\text{O}$  record and Northern Hemisphere summer insolation at 30°N <sup>12</sup>. Grey bars indicate the three main growth phases (I, II and III) of SC-06-01.

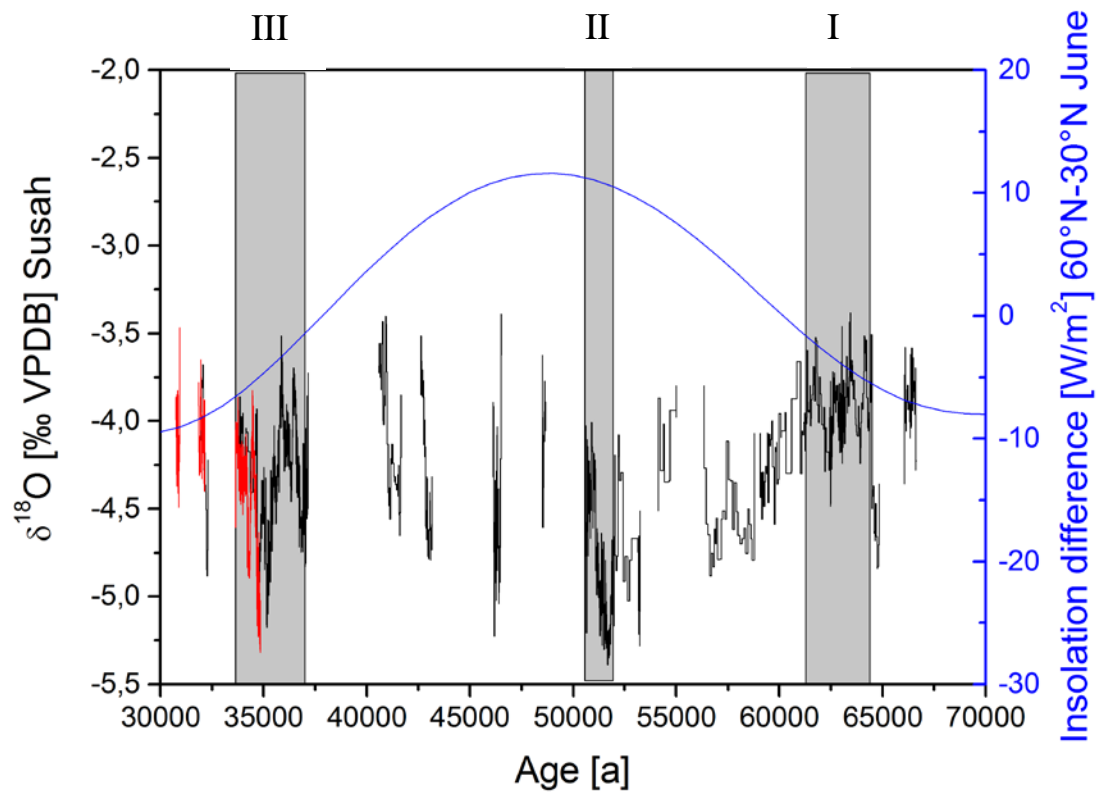

**Fig S12 b:** SC-06-01  $\delta^{18}\text{O}$  record and difference of summer insolation between  $30^\circ\text{N}$  and  $60^\circ\text{N}$  (calculated as insolation at  $60^\circ\text{N}$  minus insolation at  $30^\circ\text{N}$ )<sup>12</sup>. Grey bars indicate the three main growth phases (I, II and III) of SC-06-01. Obliquity maximum results in a maximum June insolation gradient at  $60^\circ\text{N}$  relative to  $30^\circ\text{N}$  around 50 ka.

## Hendy test results

Results of 18 Hendy tests (H1 - H18) are shown in the figures below. H1 to H15 are done on the central axis, H16 - H18 on the parallel axis of the top piece.

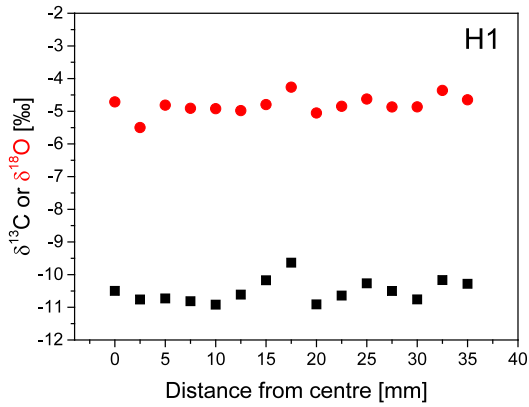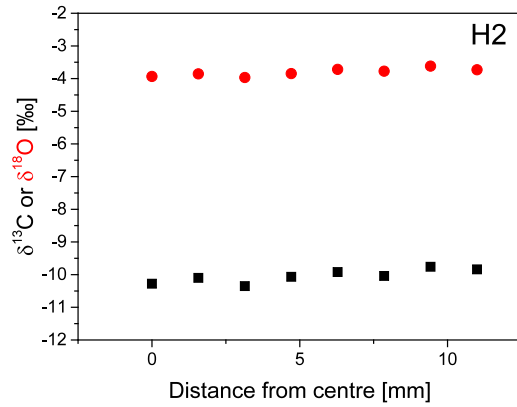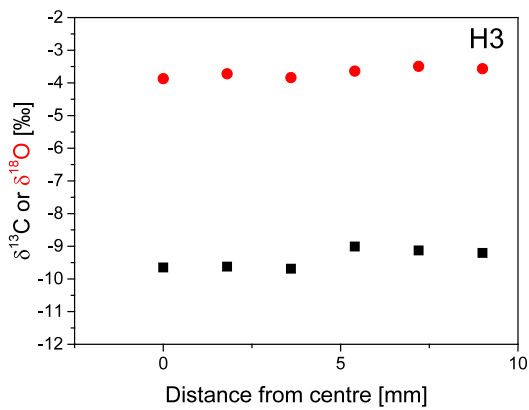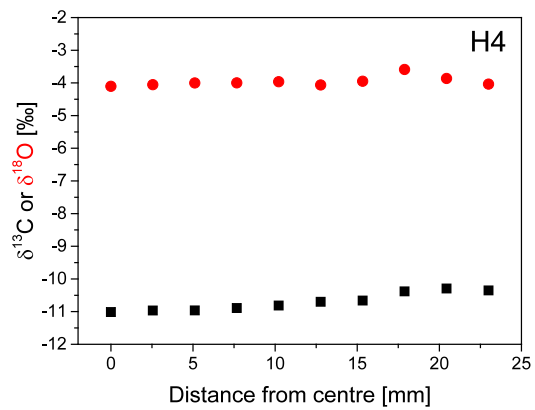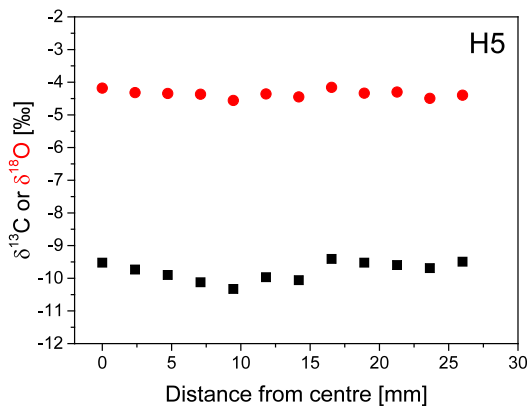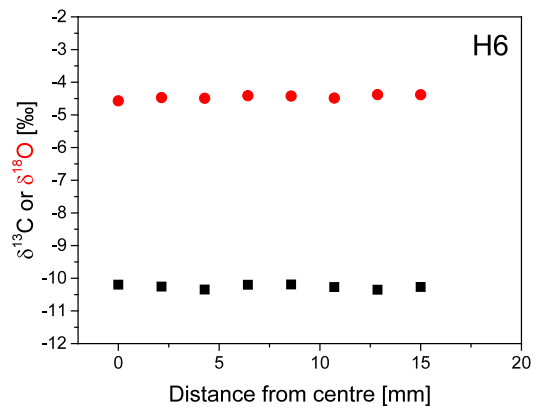

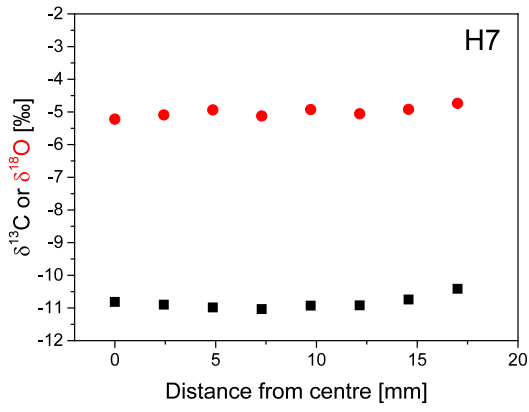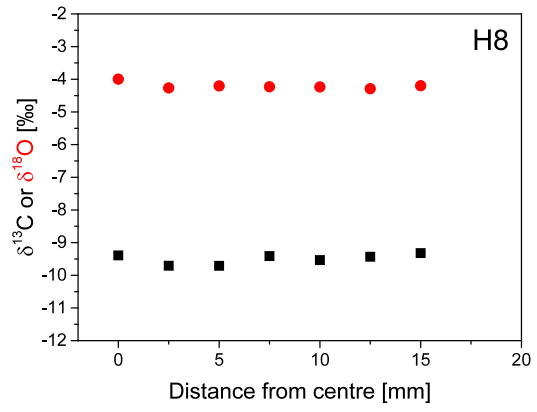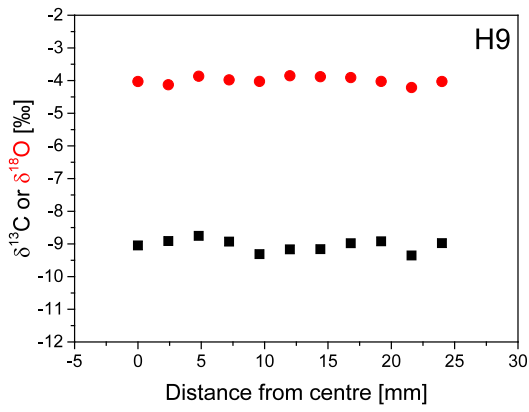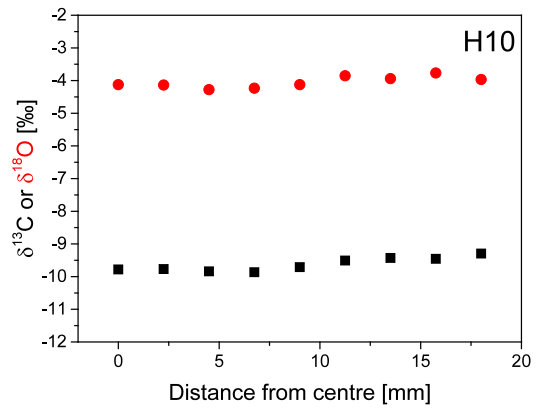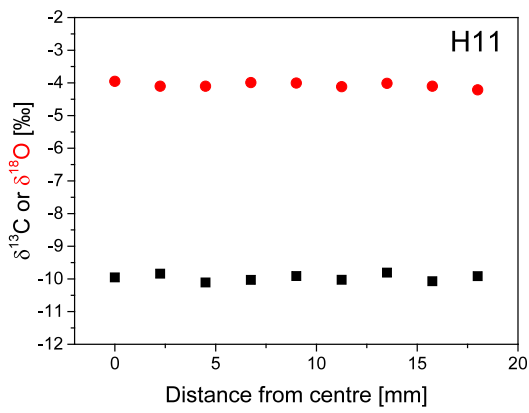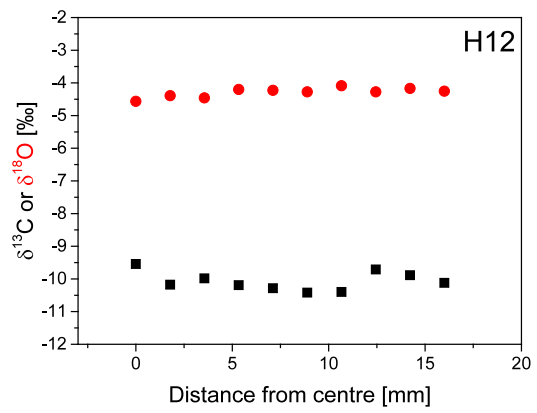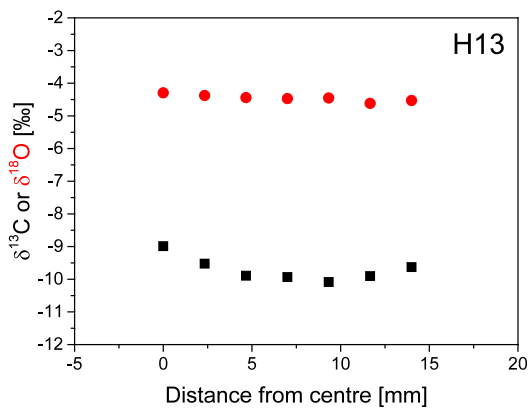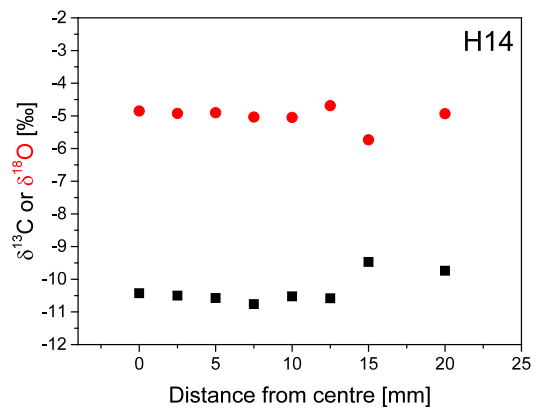

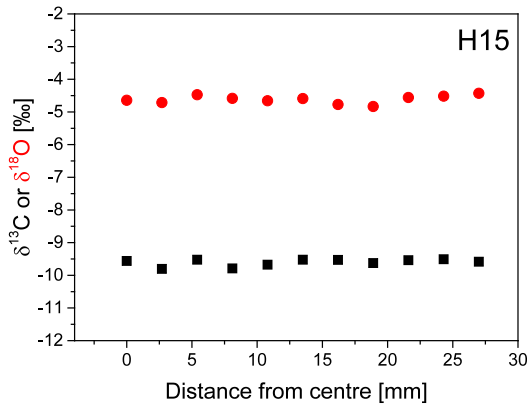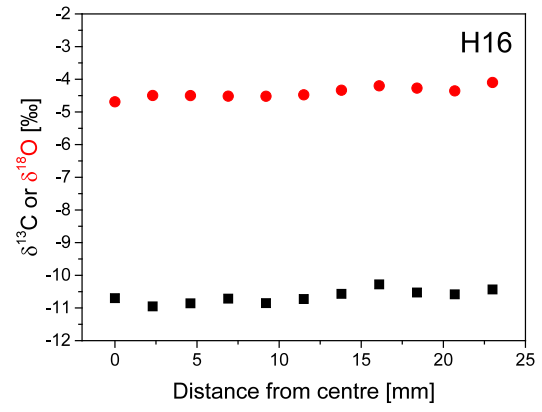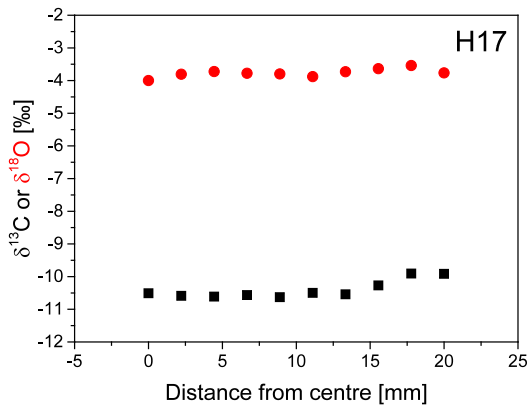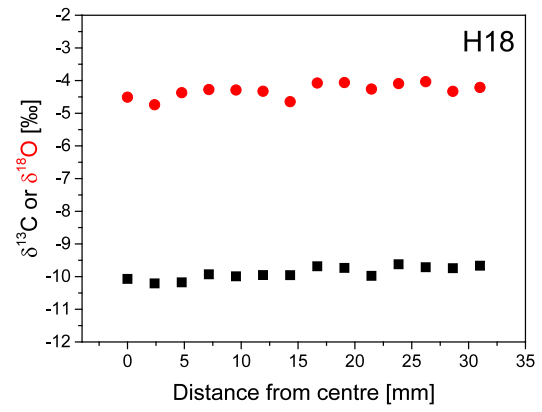

Table S1. U-series results.

| <i>spl ID</i>  | <i>distance from base</i> | $^{238}\text{U}$ | ±   | $^{232}\text{Th}$ | ±     | $^{230}\text{Th}/^{232}\text{Th}$ | ±   | $^{230}\text{Th}/^{238}\text{U}$ | ±      | $^{234}\text{U}/^{238}\text{U}$ | ±      | <i>age</i> | ±    | $^{234}\text{U}/^{238}\text{U}_{ini}$ | ±      |
|----------------|---------------------------|------------------|-----|-------------------|-------|-----------------------------------|-----|----------------------------------|--------|---------------------------------|--------|------------|------|---------------------------------------|--------|
|                | [mm]                      | (ng/g)           |     | (ng/g)            |       | activity ratio                    |     | activity ratio                   |        | activity ratio                  |        | (ka)       |      | activity ratio                        |        |
| SC-06-01 1 #03 | 4.8 (b)                   | 405.9            | 3.4 | 0.285             | 0.003 | 2520                              | 17  | 0.5798                           | 0.0023 | 1.2486                          | 0.0029 | 66.51      | 0.42 | 1.3000                                | 0.0033 |
| SC-06-01 1 #13 | 7.0                       | 455.0            | 3.8 | 0.122             | 0.002 | 6639                              | 63  | 0.5828                           | 0.0030 | 1.2582                          | 0.0025 | 66.24      | 0.49 | 1.3114                                | 0.0029 |
| SC-06-01 1 #06 | 12.7                      | 445.1            | 3.5 | 0.110             | 0.002 | 7230                              | 61  | 0.5844                           | 0.0025 | 1.2537                          | 0.0025 | 66.84      | 0.42 | 1.3065                                | 0.0028 |
| SC-06-01 1 #12 | 20.4                      | 358.3            | 3.1 | 0.083             | 0.002 | 7646                              | 102 | 0.5827                           | 0.0029 | 1.2575                          | 0.0028 | 66.28      | 0.50 | 1.3106                                | 0.0032 |
| SC-06-01 1 #21 | 29.8                      | 524.4            | 5.5 | 0.176             | 0.003 | 5315                              | 42  | 0.5827                           | 0.0022 | 1.2554                          | 0.0023 | 66.44      | 0.39 | 1.3082                                | 0.0027 |
| SC-06-01 1 #08 | 41.2                      | 614.4            | 4.9 | 0.163             | 0.002 | 6672                              | 51  | 0.5783                           | 0.0029 | 1.2529                          | 0.0036 | 65.96      | 0.52 | 1.3048                                | 0.0041 |
| SC-06-01 1 #04 | 45.1                      | 464.0            | 3.5 | 0.156             | 0.002 | 5138                              | 41  | 0.5665                           | 0.0024 | 1.2439                          | 0.0025 | 64.83      | 0.41 | 1.2929                                | 0.0029 |
| SC-06-01 1 #22 | 47.5                      | 473.9            | 3.6 | 0.227             | 0.011 | 3643                              | 90  | 0.5704                           | 0.0027 | 1.2547                          | 0.0020 | 64.62      | 0.44 | 1.3058                                | 0.0024 |
| SC-06-01 1 #07 | 54.4                      | 474.5            | 3.3 | 0.215             | 0.002 | 3811                              | 27  | 0.5645                           | 0.0025 | 1.2471                          | 0.0029 | 64.27      | 0.43 | 1.2964                                | 0.0033 |
| SC-06-01 1 #05 | 57.5                      | 375.5            | 3.1 | 0.487             | 0.006 | 1331                              | 10  | 0.5646                           | 0.0029 | 1.2413                          | 0.0024 | 64.71      | 0.47 | 1.2899                                | 0.0028 |
| SC-06-01 1 #14 | 61.3                      | 439.4            | 3.5 | 0.092             | 0.002 | 8265                              | 97  | 0.5661                           | 0.0030 | 1.2501                          | 0.0026 | 64.31      | 0.49 | 1.3000                                | 0.0029 |
| SC-06-01 1 #15 | 83.8                      | 507.9            | 3.7 | 0.054             | 0.002 | 16032                             | 276 | 0.5588                           | 0.0030 | 1.2402                          | 0.0025 | 63.93      | 0.49 | 1.2877                                | 0.0029 |
| SC-06-01 1 #23 | 93.8                      | 510.4            | 4.5 | 0.131             | 0.010 | 6567                              | 140 | 0.5534                           | 0.0028 | 1.2405                          | 0.0021 | 63.08      | 0.45 | 1.2875                                | 0.0024 |
| SC-06-01 1 #19 | 111.9                     | 520.4            | 3.9 | 0.147             | 0.003 | 5980                              | 59  | 0.5516                           | 0.0024 | 1.2356                          | 0.0020 | 63.16      | 0.40 | 1.2817                                | 0.0023 |
| SC-06-01 1 #09 | 130.6                     | 510.8            | 3.2 | 0.120             | 0.001 | 7172                              | 55  | 0.5508                           | 0.0022 | 1.2370                          | 0.0024 | 62.94      | 0.38 | 1.2832                                | 0.0027 |
| SC-06-01 1 #10 | 133.8                     | 519.6            | 3.0 | 0.025             | 0.001 | 34992                             | 444 | 0.5499                           | 0.0020 | 1.2367                          | 0.0024 | 62.83      | 0.35 | 1.2827                                | 0.0028 |
| SC-06-01 1 #20 | 148.4                     | 673.7            | 5.5 | 0.036             | 0.002 | 31048                             | 398 | 0.5487                           | 0.0019 | 1.2352                          | 0.0022 | 62.76      | 0.32 | 1.2809                                | 0.0025 |



|                |       |       |      |       |       |       |     |        |        |        |        |       |      |        |        |
|----------------|-------|-------|------|-------|-------|-------|-----|--------|--------|--------|--------|-------|------|--------|--------|
| SC-06-01 1 #24 | 167.5 | 506.6 | 4.2  | 0.187 | 0.004 | 4470  | 48  | 0.5395 | 0.0020 | 1.2251 | 0.0022 | 62.08 | 0.34 | 1.2683 | 0.0025 |
| SC-06-01 1 #16 | 176.2 | 549.9 | 4.2  | 0.036 | 0.002 | 25529 | 658 | 0.5457 | 0.0023 | 1.2309 | 0.0025 | 62.62 | 0.39 | 1.2756 | 0.0029 |
| SC-06-01 1 #25 | 185.6 | 697.1 | 4.8  | 0.206 | 0.003 | 5599  | 49  | 0.5423 | 0.0022 | 1.2274 | 0.0019 | 62.34 | 0.36 | 1.2713 | 0.0022 |
| SC-06-01 1 #02 | 189.5 | 583.7 | 5.3  | 0.115 | 0.002 | 8377  | 114 | 0.5410 | 0.0031 | 1.2140 | 0.0025 | 63.12 | 0.52 | 1.2558 | 0.0029 |
| SC-06-01 1 #11 | 196.5 | 556.7 | 4.6  | 0.043 | 0.001 | 21342 | 244 | 0.5434 | 0.0023 | 1.2293 | 0.0025 | 62.39 | 0.39 | 1.2735 | 0.0029 |
| SC-06-01 2 #06 | 207.5 | 351.3 | 2.8  | 1.107 | 0.012 | 527   | 3   | 0.5433 | 0.0025 | 1.2300 | 0.0025 | 62.25 | 0.42 | 1.2745 | 0.0029 |
| SC-06-01 2 #25 | 208.9 | 482.3 | 1.6  | 0.049 | 0.001 | 15996 | 150 | 0.5340 | 0.0019 | 1.2192 | 0.0020 | 61.67 | 0.32 | 1.2610 | 0.0023 |
| SC-06-01 2 #26 | 212.4 | 301.2 | 1.2  | 0.046 | 0.001 | 10794 | 116 | 0.5392 | 0.0018 | 1.2255 | 0.0020 | 62.01 | 0.31 | 1.2687 | 0.0023 |
| SC-06-01 2 #18 | 214.1 | 294.1 | 2.5  | 0.151 | 0.004 | 3209  | 43  | 0.5400 | 0.0026 | 1.2325 | 0.0024 | 61.62 | 0.43 | 1.2768 | 0.0027 |
| SC-06-01 2 #27 | 218.9 | 587.1 | 2.3  | 0.022 | 0.001 | 43570 | 520 | 0.5375 | 0.0017 | 1.2283 | 0.0016 | 61.56 | 0.29 | 1.2716 | 0.0019 |
| SC-06-01 2 #19 | 219.7 | 526.7 | 4.7  | 0.126 | 0.004 | 6829  | 102 | 0.5360 | 0.0022 | 1.2300 | 0.0022 | 61.22 | 0.36 | 1.2734 | 0.0025 |
| SC-06-01 2 #28 | 221.2 | 605.4 | 24.5 | 0.151 | 0.008 | 6604  | 52  | 0.5398 | 0.0022 | 1.2299 | 0.0022 | 61.78 | 0.36 | 1.2737 | 0.0025 |
| SC-06-01 2 #29 | 223.2 | 408.0 | 1.7  | 0.093 | 0.001 | 7189  | 57  | 0.5379 | 0.0022 | 1.2295 | 0.0018 | 61.53 | 0.35 | 1.2730 | 0.0021 |
| SC-06-01 2 #20 | 228.3 | 532.6 | 5.6  | 0.136 | 0.007 | 6442  | 103 | 0.5385 | 0.0023 | 1.2309 | 0.0020 | 61.52 | 0.38 | 1.2747 | 0.0023 |
| SC-06-01 2 #30 | 229.1 | 620.6 | 2.5  | 0.053 | 0.001 | 19204 | 191 | 0.5367 | 0.0017 | 1.2319 | 0.0019 | 61.17 | 0.29 | 1.2757 | 0.0021 |
| SC-06-01 2 #31 | 233.6 | 475.3 | 2.6  | 0.076 | 0.001 | 10272 | 89  | 0.5376 | 0.0024 | 1.2329 | 0.0020 | 61.24 | 0.38 | 1.2769 | 0.0023 |
| SC-06-01 2 #07 | 233.9 | 539.8 | 4.2  | 0.130 | 0.002 | 6864  | 55  | 0.5404 | 0.0023 | 1.2381 | 0.0023 | 61.31 | 0.38 | 1.2832 | 0.0027 |
| SC-06-01 2 #01 | 238.8 | 549.2 | 4.4  | 0.349 | 0.004 | 2584  | 21  | 0.5371 | 0.0028 | 1.2381 | 0.0025 | 60.81 | 0.45 | 1.2828 | 0.0028 |
| SC-06-01 2 #21 | 241.1 | 738.5 | 7.2  | 0.353 | 0.007 | 3422  | 31  | 0.5354 | 0.0023 | 1.2437 | 0.0019 | 60.17 | 0.37 | 1.2889 | 0.0022 |
| SC-06-01 2 #22 | 245.7 | 736.6 | 6.6  | 0.642 | 0.009 | 1855  | 14  | 0.5290 | 0.0020 | 1.2354 | 0.0021 | 59.78 | 0.32 | 1.2788 | 0.0024 |
| SC-06-01 2 #23 | 254.5 | 431.7 | 3.6  | 0.609 | 0.008 | 1155  | 9   | 0.5331 | 0.0023 | 1.2451 | 0.0020 | 59.73 | 0.36 | 1.2903 | 0.0023 |
| SC-06-01 2 #32 | 255.3 | 388.1 | 1.9  | 0.137 | 0.002 | 4624  | 48  | 0.5323 | 0.0027 | 1.2438 | 0.0021 | 59.72 | 0.42 | 1.2887 | 0.0024 |

|                |       |       |      |       |       |       |     |        |        |        |        |       |      |        |        |
|----------------|-------|-------|------|-------|-------|-------|-----|--------|--------|--------|--------|-------|------|--------|--------|
| SC-06-01 2 #24 | 263.8 | 521.2 | 4.3  | 0.074 | 0.003 | 11347 | 143 | 0.5276 | 0.0021 | 1.2409 | 0.0020 | 59.22 | 0.33 | 1.2849 | 0.0023 |
| SC-06-01 2 #08 | 269.7 | 460.8 | 4.1  | 0.058 | 0.001 | 12578 | 140 | 0.5192 | 0.0024 | 1.2398 | 0.0027 | 58.07 | 0.39 | 1.2826 | 0.0031 |
| SC-06-01 2 #44 | 277.7 | 517.9 | 6.5  | 0.291 | 0.004 | 2838  | 22  | 0.5221 | 0.0024 | 1.2413 | 0.0027 | 58.38 | 0.39 | 1.2846 | 0.0030 |
| SC-06-01 2 #45 | 287.2 | 636.2 | 10.4 | 0.443 | 0.008 | 2279  | 16  | 0.5198 | 0.0026 | 1.2591 | 0.0026 | 56.93 | 0.39 | 1.3044 | 0.0028 |
| SC-06-01 2 #03 | 294.9 | 625.4 | 4.2  | 0.275 | 0.004 | 3587  | 35  | 0.5167 | 0.0023 | 1.2451 | 0.0027 | 57.38 | 0.37 | 1.2882 | 0.0030 |
| SC-06-01 2 #11 | 300.2 | 378.7 | 3.6  | 0.126 | 0.002 | 4560  | 39  | 0.4967 | 0.0025 | 1.2372 | 0.0031 | 55.01 | 0.41 | 1.2771 | 0.0035 |
| SC-06-01 2 #36 | 300.9 | 416.7 | 5.1  | 0.418 | 0.009 | 1506  | 16  | 0.4939 | 0.0033 | 1.2354 | 0.0031 | 54.71 | 0.50 | 1.2748 | 0.0035 |
| SC-06-01 2 #48 | 301.7 | 477.5 | 6.0  | 0.481 | 0.008 | 1498  | 11  | 0.4934 | 0.0025 | 1.2401 | 0.0025 | 54.36 | 0.39 | 1.2800 | 0.0028 |
| SC-06-01 2 #49 | 302.5 | 391.8 | 5.8  | 0.412 | 0.008 | 1443  | 14. | 0.4965 | 0.0024 | 1.2433 | 0.0028 | 54.59 | 0.37 | 1.2840 | 0.0032 |
| SC-06-01 2 #50 | 303.9 | 328.6 | 6.2  | 0.606 | 0.013 | 821   | 8   | 0.4954 | 0.0031 | 1.2452 | 0.0030 | 54.32 | 0.47 | 1.2860 | 0.0034 |
| SC-06-01 2 #40 | 306.0 | 454.9 | 8.3  | 1.036 | 0.024 | 649   | 5   | 0.4840 | 0.0026 | 1.2401 | 0.0027 | 53.01 | 0.39 | 1.2791 | 0.0030 |
| SC-06-01 2 #12 | 306.5 | 351.4 | 2.9  | 0.097 | 0.001 | 5388  | 59  | 0.4881 | 0.0027 | 1.2500 | 0.0038 | 53.07 | 0.43 | 1.2905 | 0.0042 |
| SC-06-01 2 #37 | 315.8 | 348.3 | 3.7  | 0.198 | 0.007 | 2602  | 45  | 0.4841 | 0.0035 | 1.2348 | 0.0028 | 53.37 | 0.51 | 1.2731 | 0.0032 |
| SC-06-01 2 #43 | 325.2 | 274.2 | 2.3  | 0.111 | 0.003 | 3632  | 40  | 0.4820 | 0.0032 | 1.2384 | 0.0027 | 52.88 | 0.47 | 1.2768 | 0.0030 |
| SC-06-01 2 #38 | 327.3 | 279.2 | 3.1  | 0.956 | 0.015 | 437   | 5   | 0.4899 | 0.0038 | 1.2422 | 0.0041 | 53.66 | 0.58 | 1.2821 | 0.0046 |
| SC-06-01 2 #13 | 332.3 | 349.4 | 2.8  | 0.153 | 0.002 | 3382  | 27  | 0.4858 | 0.0028 | 1.2399 | 0.0037 | 53.32 | 0.45 | 1.2789 | 0.0042 |
| SC-06-01 2 #39 | 335.9 | 284.1 | 2.8  | 0.267 | 0.007 | 1571  | 23  | 0.4827 | 0.0034 | 1.2505 | 0.0031 | 52.27 | 0.49 | 1.2905 | 0.0035 |
| SC-06-01 2 #14 | 342.7 | 276.8 | 2.4  | 0.062 | 0.001 | 6524  | 74  | 0.4808 | 0.0026 | 1.2477 | 0.0029 | 52.19 | 0.39 | 1.2871 | 0.0033 |
| SC-06-01 2 #04 | 351.7 | 301.5 | 2.3  | 0.090 | 0.002 | 4893  | 49  | 0.4769 | 0.0031 | 1.2475 | 0.0031 | 51.67 | 0.46 | 1.2864 | 0.0035 |
| SC-06-01 2 #16 | 373.6 | 328.5 | 1.7  | 0.032 | 0.001 | 14695 | 149 | 0.4737 | 0.0018 | 1.2340 | 0.0021 | 51.99 | 0.28 | 1.2710 | 0.0024 |
| SC-06-01 2 #41 | 400.0 | 331.3 | 2.7  | 0.133 | 0.003 | 3585  | 38  | 0.4702 | 0.0027 | 1.2378 | 0.0022 | 51.28 | 0.39 | 1.2750 | 0.0025 |
| SC-06-01 2 #17 | 455.6 | 233.7 | 1.3  | 0.069 | 0.001 | 4894  | 39  | 0.4737 | 0.0023 | 1.2458 | 0.0025 | 51.32 | 0.34 | 1.2842 | 0.0028 |

|                |       |       |      |       |       |       |     |        |        |        |        |       |       |        |        |
|----------------|-------|-------|------|-------|-------|-------|-----|--------|--------|--------|--------|-------|-------|--------|--------|
| SC-06-01 2 #42 | 477.0 | 241.2 | 3.4  | 0.182 | 0.005 | 1923  | 22  | 0.4739 | 0.0036 | 1.2563 | 0.0030 | 50.77 | 0.51  | 1.2959 | 0.0033 |
| SC-06-01 2 #05 | 496.8 | 295.4 | 2.4  | 0.095 | 0.002 | 4437  | 56  | 0.4664 | 0.0030 | 1.2414 | 0.0033 | 50.57 | 0.44  | 1.2785 | 0.0037 |
| SC-06-01 2 #02 | 503.4 | 338.9 | 2.6  | 0.298 | 0.003 | 1579  | 16  | 0.4537 | 0.0030 | 1.2462 | 0.0027 | 48.60 | 0.42  | 1.2825 | 0.0031 |
| SC-06-01 2 #33 | 503.5 | 387.3 | 15.4 | 0.036 | 0.002 | 14935 | 167 | 0.4538 | 0.0017 | 1.2487 | 0.0020 | 48.51 | 0.25  | 1.2852 | 0.0022 |
| SC-06-01 2 #46 | 505.0 | 330.8 | 5.1  | 1.234 | 0.020 | 410   | 4   | 0.4555 | 0.0036 | 1.2497 | 0.0030 | 48.61 | 0.50  | 1.2867 | 0.0033 |
| SC-06-01 2 #34 | 506.3 | 269.5 | 10.3 | 0.108 | 0.008 | 3468  | 56  | 0.4531 | 0.0025 | 1.2502 | 0.0025 | 48.33 | 0.35  | 1.2869 | 0.0028 |
| SC-06-01 2 #35 | 508.5 | 290.8 | 11.9 | 0.139 | 0.010 | 2924  | 52  | 0.4557 | 0.0031 | 1.2509 | 0.0028 | 48.64 | 0.44  | 1.2880 | 0.0032 |
| SC-06-01 2 #47 | 512.5 | 433.2 | 6.8  | 0.410 | 0.008 | 1467  | 12  | 0.4538 | 0.0032 | 1.2474 | 0.0029 | 48.55 | 0.45  | 1.2839 | 0.0032 |
| SC-06-01 3 #04 | 520.5 | 332.3 | 3.0  | 1.413 | 0.013 | 326   | 2   | 0.4539 | 0.0025 | 1.2411 | 0.0023 | 48.81 | 0.36  | 1.2770 | 0.0025 |
| SC-06-01 3 #44 | 523.0 | 490.1 | 2.7  | 0.196 | 0.002 | 3382  | 30  | 0.4423 | 0.0020 | 1.2578 | 0.0019 | 46.55 | 0.27  | 1.2941 | 0.0021 |
| SC-06-01 3 #21 | 531.9 | 325.2 | 1.0  | 0.145 | 0.001 | 3024  | 24  | 0.4419 | 0.0023 | 1.2665 | 0.0021 | 46.08 | 0.310 | 1.3036 | 0.0023 |
| SC-06-01 3 #22 | 535.3 | 322.2 | 1.0  | 0.045 | 0.001 | 9768  | 86  | 0.4419 | 0.0021 | 1.2620 | 0.0020 | 46.30 | 0.29  | 1.2986 | 0.0022 |
| SC-06-01 3 #24 | 537.3 | 339.6 | 1.6  | 0.036 | 0.001 | 11940 | 117 | 0.4151 | 0.0016 | 1.2566 | 0.0020 | 43.14 | 0.22  | 1.2898 | 0.0022 |
| SC-06-01 3 #07 | 538.8 | 267.7 | 2.0  | 0.117 | 0.001 | 2877  | 22  | 0.4115 | 0.0024 | 1.2519 | 0.0023 | 42.89 | 0.32  | 1.2844 | 0.0026 |
| SC-06-01 3 #25 | 539.8 | 280.0 | 1.4  | 0.141 | 0.002 | 2504  | 18  | 0.4137 | 0.0017 | 1.2531 | 0.0021 | 43.11 | 0.23  | 1.2859 | 0.0023 |
| SC-06-01 3 #26 | 541.6 | 215.9 | 1.0  | 0.269 | 0.003 | 1013  | 6   | 0.4125 | 0.0018 | 1.2532 | 0.0021 | 42.94 | 0.24  | 1.2860 | 0.0023 |
| SC-06-01 3 #05 | 545.9 | 198.5 | 1.8  | 0.315 | 0.004 | 7889  | 7   | 0.4097 | 0.0036 | 1.2414 | 0.0035 | 43.08 | 0.48  | 1.2728 | 0.0038 |
| SC-06-01 3 #27 | 546.3 | 195.9 | 0.9  | 0.120 | 0.002 | 2044  | 21  | 0.4096 | 0.0023 | 1.2560 | 0.0025 | 42.47 | 0.31  | 1.2887 | 0.0027 |
| SC-06-01 3 #28 | 549.3 | 241.6 | 0.7  | 0.181 | 0.001 | 1626  | 9   | 0.3985 | 0.0017 | 1.2460 | 0.0019 | 41.49 | 0.23  | 1.2767 | 0.0021 |
| SC-06-01 3 #06 | 551.8 | 264.2 | 2.6  | 0.317 | 0.003 | 1003  | 8   | 0.3940 | 0.0026 | 1.2386 | 0.0030 | 41.23 | 0.36  | 1.2682 | 0.0033 |
| SC-06-01 3 #29 | 551.8 | 201.0 | 0.7  | 0.122 | 0.001 | 1964  | 15  | 0.3915 | 0.0020 | 1.2415 | 0.0021 | 40.82 | 0.26  | 1.2711 | 0.0023 |
| SC-06-01 3 #30 | 554.1 | 134.0 | 0.4  | 0.319 | 0.002 | 506   | 4   | 0.3938 | 0.0021 | 1.2478 | 0.0021 | 40.80 | 0.28  | 1.2782 | 0.0023 |

|                |       |       |       |       |       |       |     |        |        |        |        |       |      |        |        |
|----------------|-------|-------|-------|-------|-------|-------|-----|--------|--------|--------|--------|-------|------|--------|--------|
| SC-06-01 3 #31 | 558.1 | 302.6 | 0.8   | 0.124 | 0.001 | 2710  | 19  | 0.3629 | 0.0016 | 1.2531 | 0.0020 | 36.86 | 0.21 | 1.2810 | 0.0022 |
| SC-06-01 3 #08 | 558.2 | 363.5 | 3.6   | 0.356 | 0.004 | 1134  | 7   | 0.3635 | 0.0020 | 1.2479 | 0.0024 | 37.13 | 0.26 | 1.2754 | 0.0027 |
| SC-06-01 3 #32 | 558.2 | 409.8 | 1.2   | 0.209 | 0.002 | 2183  | 17  | 0.3640 | 0.0018 | 1.2547 | 0.0020 | 36.94 | 0.23 | 1.2828 | 0.0021 |
| SC-06-01 3 #33 | 559.8 | 425.9 | 1.0   | 0.023 | 0.001 | 20722 | 172 | 0.3595 | 0.0017 | 1.2415 | 0.0020 | 36.90 | 0.22 | 1.2680 | 0.0022 |
| SC-06-01 3 #01 | 560.6 | 343.0 | 2.7   | 0.173 | 0.002 | 2206  | 24  | 0.3631 | 0.0024 | 1.2404 | 0.0027 | 37.36 | 0.31 | 1.2672 | 0.0029 |
| SC-06-01 3 #34 | 561.4 | 404.9 | 140.9 | 0.015 | 0.008 | 30242 | 557 | 0.3635 | 0.0015 | 1.2446 | 0.0022 | 37.26 | 0.20 | 1.2718 | 0.0024 |
| SC-06-01 3 #48 | 566.8 | 320.2 | 2.6   | 0.209 | 0.003 | 1711  | 16  | 0.3649 | 0.0022 | 1.2470 | 0.0025 | 37.34 | 0.29 | 1.2745 | 0.0027 |
| SC-06-01 3 #45 | 585.3 | 323.2 | 2.1   | 0.064 | 0.001 | 5615  | 57  | 0.3611 | 0.0020 | 1.2447 | 0.0021 | 36.97 | 0.25 | 1.2716 | 0.0023 |
| SC-06-01 3 #46 | 631.4 | 227.5 | 1.5   | 0.114 | 0.002 | 2199  | 21  | 0.3599 | 0.0024 | 1.2476 | 0.0026 | 36.71 | 0.30 | 1.2747 | 0.0028 |
| SC-06-01 3 #47 | 651.8 | 262.9 | 2.1   | 0.408 | 0.004 | 706   | 6   | 0.3587 | 0.0023 | 1.2510 | 0.0027 | 36.42 | 0.29 | 1.2784 | 0.0030 |
| SC-06-01 3 #18 | 683.6 | 441.4 | 2.9   | 0.045 | 0.001 | 10730 | 146 | 0.3583 | 0.0015 | 1.2481 | 0.0025 | 36.52 | 0.20 | 1.2750 | 0.0027 |
| SC-06-01 3 #35 | 724.5 | 280.7 | 0.9   | 0.080 | 0.001 | 3827  | 35  | 0.3561 | 0.0021 | 1.2497 | 0.0022 | 36.19 | 0.26 | 1.2766 | 0.0024 |
| SC-06-01 3 #15 | 760.2 | 444.4 | 3.9   | 0.717 | 0.009 | 665   | 5   | 0.3515 | 0.0020 | 1.2428 | 0.0030 | 35.85 | 0.26 | 1.2688 | 0.0032 |
| SC-06-01 3 #10 | 822.4 | 156.0 | 11.2  | 0.089 | 0.011 | 1872  | 79  | 0.3482 | 0.0033 | 1.2473 | 0.0049 | 35.33 | 0.43 | 1.2733 | 0.0053 |
| SC-06-01 3 #19 | 862.9 | 331.6 | 2.5   | 0.033 | 0.001 | 10345 | 149 | 0.3369 | 0.0019 | 1.2159 | 0.0027 | 35.07 | 0.25 | 1.2384 | 0.0029 |
| SC-06-01 3 #11 | 896.6 | 342.0 | 25.9  | 0.070 | 0.012 | 4977  | 338 | 0.3352 | 0.0023 | 1.2223 | 0.0032 | 34.64 | 0.30 | 1.2452 | 0.0035 |
| SC-06-01 3 #16 | 908.7 | 280.4 | 2.6   | 0.104 | 0.002 | 2765  | 31  | 0.3346 | 0.0026 | 1.2439 | 0.0034 | 33.85 | 0.32 | 1.2685 | 0.0037 |
| SC-06-01 3 #42 | 913.5 | 263.3 | 2.7   | 0.642 | 0.009 | 418   | 3   | 0.3334 | 0.0017 | 1.2301 | 0.0022 | 34.11 | 0.22 | 1.2535 | 0.0024 |
| SC-06-01 3 #17 | 924.6 | 252.0 | 2.3   | 0.211 | 0.003 | 1162  | 12  | 0.3182 | 0.0025 | 1.2357 | 0.0034 | 32.18 | 0.31 | 1.2582 | 0.0037 |
| SC-06-01 3 #43 | 930.4 | 288.7 | 3.3   | 1.163 | 0.015 | 241   | 2   | 0.3180 | 0.0020 | 1.2342 | 0.0026 | 32.13 | 0.25 | 1.2567 | 0.0028 |
| SC-06-01 3 #02 | 933.6 | 239.2 | 1.5   | 0.224 | 0.003 | 1011  | 11  | 0.3099 | 0.0023 | 1.2087 | 0.0032 | 32.04 | 0.29 | 1.2286 | 0.0034 |
| SC-06-01 3 #09 | 243.6 | 357.8 | 26.9  | 0.038 | 0.008 | 9692  | 930 | 0.3342 | 0.0024 | 1.2150 | 0.0030 | 34.78 | 0.30 | 1.2372 | 0.0033 |

|                |       |       |      |       |       |      |     |        |        |        |        |       |      |        |        |
|----------------|-------|-------|------|-------|-------|------|-----|--------|--------|--------|--------|-------|------|--------|--------|
| SC-06-01 3 #12 | 211.3 | 263.9 | 21.0 | 0.091 | 0.011 | 2929 | 117 | 0.3321 | 0.0020 | 1.2100 | 0.0033 | 34.69 | 0.27 | 1.2317 | 0.0036 |
| SC-06-01 3 #13 | 154.3 | 338.3 | 26.3 | 0.160 | 0.017 | 2155 | 71  | 0.3331 | 0.0022 | 1.2236 | 0.0029 | 34.34 | 0.29 | 1.2464 | 0.0031 |
| SC-06-01 3 #41 | 77.3  | 286.6 | 3.9  | 1.063 | 0.017 | 274  | 2   | 0.3329 | 0.0024 | 1.2376 | 0.0027 | 33.77 | 0.30 | 1.2617 | 0.0029 |
| SC-06-01 3 #40 | 58.6  | 239.1 | 2.5  | 0.517 | 0.007 | 466  | 4   | 0.3295 | 0.0019 | 1.2346 | 0.0029 | 33.51 | 0.24 | 1.2580 | 0.0032 |
| SC-06-01 3 #36 | 54.4  | 212.5 | 3.2  | 0.894 | 0.016 | 245  | 3   | 0.3370 | 0.0034 | 1.2249 | 0.0080 | 34.67 | 0.50 | 1.2483 | 0.0087 |
| SC-06-01 3 #14 | 51.1  | 258.6 | 2.8  | 0.138 | 0.002 | 1798 | 23  | 0.3135 | 0.0026 | 1.2284 | 0.0041 | 31.86 | 0.33 | 1.2499 | 0.0044 |
| SC-06-01 3 #39 | 46.3  | 286.9 | 4.0  | 0.492 | 0.007 | 566  | 5   | 0.3173 | 0.0019 | 1.2299 | 0.0024 | 32.23 | 0.23 | 1.2520 | 0.0026 |
| SC-06-01 3 #37 | 37.4  | 251.7 | 3.8  | 0.251 | 0.013 | 958  | 21  | 0.3129 | 0.0038 | 1.2239 | 0.0034 | 31.92 | 0.46 | 1.2451 | 0.0036 |
| SC-06-01 3 #38 | 33.3  | 756.1 | 29.0 | 0.105 | 0.009 | 6767 | 155 | 0.3068 | 0.0017 | 1.2352 | 0.0025 | 30.89 | 0.21 | 1.2567 | 0.0026 |
| SC-06-01 3 #20 | 10.9  | 402.0 | 3.2  | 0.066 | 0.001 | 5693 | 67  | 0.3065 | 0.0016 | 1.2372 | 0.0028 | 30.79 | 0.20 | 1.2587 | 0.0030 |
| SC-06-01 3 #03 | 7.8   | 348.0 | 2.1  | 0.127 | 0.002 | 2573 | 26  | 0.3064 | 0.0019 | 1.2354 | 0.0026 | 30.83 | 0.23 | 1.2569 | 0.0028 |

All ratios are activity ratios. Analytical errors are at 95 % confidence level. Shown are uncorrected activity ratios.

Age calculation is based on  $\left(\frac{^{230}\text{Th}}{^{238}\text{U}}\right) (T) = (1 - e^{-\lambda_{230} T}) + \left(\left(\frac{^{234}\text{U}}{^{238}\text{U}}\right) (T) - 1\right) \frac{\lambda_{230}}{\lambda_{230} - \lambda_{234}} (1 - e^{-(\lambda_{230} - \lambda_{234}) T})$  where T is the age of the sample.

The degree of detrital  $^{230}\text{Th}$  contamination is indicated by the measured  $^{230}\text{Th}/^{232}\text{Th}$  activity ratio and corrections were calculated using a  $^{238}\text{U}/^{232}\text{Th}$  activity ratio of  $0.8 \pm 0.4$ .

$^{234}\text{U}/^{238}\text{U}_{\text{ini}}$  is the initial  $^{234}\text{U}/^{238}\text{U}$  activity ratio.

Ages are calculated based on corrected activity ratios. For all samples, correction is less than 0.1 ka and corrected and uncorrected results are identical within uncertainties.

## References

- 1 Abdulsamad, E. O. Stratigraphy and palaeobiogeography of Tertiary larger foraminifera from Al Jabal al Akhdar (Cyrenaica, NE Libya). *Giornale di Geologia (Bologna)* **61**, 75-98 (1999).
- 2 Engelstaedter, S., Tegen, I. & Washington, R. North African dust emissions and transport. *Earth-Sci. Rev.* **79**, 73-100, doi:10.1016/j.earscirev.2006.06.004 (2006).
- 3 Hoffmann, D. L. Th-230 isotope measurements of femtogram quantities for U-series dating using multi ion counting (MIC) MC-ICPMS. *Int. J. Mass Spectrom.* **275**, 75-79, doi:10.1016/j.ijms.2008.05.033 (2008).
- 4 Hoffmann, D. L. *et al.* Procedures for accurate U and Th isotope measurements by high precision MC-ICPMS. *Int. J. Mass Spectrom.* **264**, 97-109 (2007).
- 5 Jaffey, A. H., Flynn, K. F., Glendenin, L. E., Bentley, W. C. & Essling, A. M. Precision Measurement of Half-Lives and Specific Activities of U-235 and U-238. *Phys. Rev. C* **4**, 1889-& (1971).
- 6 Cheng, H. *et al.* The half-lives of uranium-234 and thorium-230. *Chem. Geol.* **169**, 17-33 (2000).
- 7 Holden, N. E. Total Half-Lives for Selected Nuclides. *Pure Appl. Chem.* **62**, 941-958 (1990).
- 8 Wedepohl, K. H. The Composition of the Continental-Crust. *Geochim. Cosmochim. Acta* **59**, 1217-1232 (1995).
- 9 Scholz, D. & Hoffmann, D. L. StalAge - An algorithm designed for construction of speleothem age models. *Quat. Geochronol.* **6**, 369-382, doi:10.1016/j.quageo.2011.02.002 (2011).
- 10 Svensson, A. *et al.* A 60 000 year Greenland stratigraphic ice core chronology. *Clim. Past.* **4**, 47-57 (2008).
- 11 Wolff, E. W., Chappellaz, J., Blunier, T., Rasmussen, S. O. & Svensson, A. Millennial-scale variability during the last glacial: The ice core record. *Quat. Sci. Rev.* **29**, 2828-2838, doi:10.1016/j.quascirev.2009.10.013 (2010).
- 12 Berger, A. & Loutre, M. F. Insolation values for the climate of the last 10000000 years. *Quat. Sci. Rev.* **10**, 297-317, doi:10.1016/0277-3791(91)90033-q (1991).
